1 **Title page.**

2

3 **The genomic basis of domestic colonisation and dispersal in Chagas disease**

4 **vectors.**

5

6 Luis E Hernandez-Castro<sup>\*1</sup>, Anita G Villacis<sup>2</sup>, Arne Jacobs<sup>3</sup>, Bachar Cheaib<sup>1</sup>, Casey C Day<sup>4</sup>,

7 Sofía Ocaña-Mayorga<sup>2</sup>, Cesar A Yumiseva<sup>2</sup>, Antonella Bacigalupo<sup>1</sup> Björn Andersson<sup>5</sup>,

8 Louise Matthews<sup>1</sup>, Erin L Landguth<sup>4,6</sup>, Jaime A Costales<sup>2</sup>, Martin S Llewellyn<sup>1\*1</sup>, Mario J

9 Grijalva<sup>12,7</sup>

10

11 **1.** Institute of Biodiversity, Animal Health and Comparative Medicine, University of Glasgow,

12 Glasgow, United Kingdom.

13 **2.** Centro de Investigación para la Salud en América Latina, Facultad de Ciencias Exactas y

14 Naturales, Pontificia Universidad Católica del Ecuador, Quito, Ecuador.

15 **3.** Department of Natural Resources, Cornell University, Ithaca, United States of America.

16 **4.** Computational Ecology Lab, School of Public and Community Health Sciences, University

17 of Montana, Missoula, United States of America.

18 **5.** Department of Cell and Molecular Biology, Karolinska Institutet, Stockholm, Sweden.

19 **6.** Center for Population Health Research, School of Public and Community Health

20 Sciences, University of Montana, Missoula, United States of America.

21 **7.** Infectious and Tropical Disease Institute, Department of Biomedical Sciences, Heritage

22 College of Osteopathic Medicine, Ohio University, Ohio, United States of America.

23

24 \* Corresponding authors

25 Luis E Hernandez Castro: [enriqhernandez18@gmail.com](mailto:enriqhernandez18@gmail.com)

26 Martin Llewellyn: [martin.llewellyn@glasgow.ac.uk](mailto:martin.llewellyn@glasgow.ac.uk)

27 ¶ These authors contributed equally to this work.

28

29 **Abstract.**

30

31 The biology of vector adaptation to the human habitat remains poorly understood for many

32 arthropod-borne diseases but underpins effective and sustainable disease control. We

33 adopted a landscape genomics approach to investigate gene flow, signatures of local

34 adaptation, and drivers of population structure among multiple linked wild and domestic

35 population pairs in *Rhodnius ecuadoriensis*, an important vector of Chagas Disease.

36 Evidence of high triatomine gene flow ( $F_{ST}$ ) between wild and domestic ecotopes at sites

37 throughout the study area indicate insecticide-based control will be hindered by constant re-

38 infestation of houses. Genome scans revealed genetic loci with strong signal of local

39 adaptation to the domestic setting, which we mapped to annotated regions in the *Rhodnius*

40 *prolixus* genome. Our landscape genomic mixed effects models showed *Rhodnius*

41 *ecuadoriensis* population structure and connectivity is driven by landscape elevation at a

42 regional scale. Our ecologically- and spatially-explicit vector dispersal model enables

43 targeted vector control and recommends spatially discrete, periodic interventions to local

44 authorities as more efficacious than current, haphazard approaches. In tandem, evidence for

45 parallel genomic adaptation to colonisation of the domestic environment at multiple sites

46 sheds new light on the evolutionary basis of adaptation to the human host in arthropod  
47 vectors.

48

49 **Main.**

50

51 The process by which insect vectors of human diseases adapt to survive and breed in  
52 human habitats is fundamental to the emergence and spread of vector-borne disease  
53 (e.g., *Aedes aegypti*<sup>1</sup>). Relatively modest changes in vector host preference between  
54 ancestral (wild) and derived (domesticated) forms can drive devastating epidemics that  
55 result in millions of deaths<sup>2</sup>. Understanding the evolution and genetic bases of traits  
56 associated with domestication in disease vectors is, therefore, paramount and could inform  
57 control efforts and reveal the epidemic potential for new vector species<sup>3,4</sup>. Furthermore, an  
58 accurate definition of landscape functional connectivity (the level at which the landscape  
59 heterogeneity facilitates or impedes an organism's movement from, and to, different habitat  
60 patches<sup>5</sup>) can shed light on the drivers of vector dispersal, and even assist in identifying  
61 poorly connected or isolated areas that can be easily targeted by eradication interventions<sup>6-</sup>  
62 <sup>8</sup>.

63

64 Triatominae (Hemiptera: Reduviidae) are a group of hematophagous arthropods that  
65 transmit *Trypanosoma cruzi*, the parasite that causes Chagas disease, a fatal parasitic  
66 infection afflicting > 7 million people in Latin America<sup>9</sup>. Eradication of 'domesticated'  
67 triatomines has been the mainstay of disease control in the past (e.g., *Triatoma infestans*<sup>10</sup>,  
68 *Rhodnius prolixus* and *Triatoma dimidiata*<sup>11</sup>). However, wild (e.g., *T. infestans*<sup>12</sup> and *R.*

69 *prolixus*<sup>13</sup>) and/or secondary competent species of triatomines (e.g., *Triatoma sordida*<sup>14</sup>,  
70 *Triatoma maculata* and *Rhodnius pallescens*<sup>15</sup>, *Panstrongylus howardi*<sup>16</sup> and *P. chinai*<sup>17</sup>) can  
71 occupy empty domestic niches and continue to jeopardise Chagas disease control  
72 strategies.

73

74 Colonisation of the domestic niche may involve multiple, independent evolutionary  
75 processes across the geographic distribution of a given vector species<sup>18,19</sup>, analogous to  
76 parallel trophic speciation observed in other arthropods<sup>20</sup>. Alternately, domestication of  
77 zoonotic parasites and their vectors may result from a single or limited number of  
78 independent colonisation events, followed by rapid and widespread dispersal within the  
79 domestic setting<sup>21,22</sup>. Domestication of a given species may also represent a combination of  
80 these two scenarios, where multiple domesticated lineages serially introgress with wild  
81 lineages over evolutionary time, as has been elegantly demonstrated through analysis of the  
82 genomes of the domestic pig<sup>23</sup>. Disentangling these different scenarios in triatomine species,  
83 and their important implications for disease control, has been challenging due to a lack of  
84 genomic resources for these organisms which are only recently becoming available<sup>24-26</sup>.  
85 With adequate genomic tools; however, the occurrence of domestic colonisation can be  
86 established, and its underlying mechanisms unveiled. Parallel colonisation events explored  
87 using models of 'adaptation with gene flow' (e.g.,<sup>27</sup>) can exploit standard population genetic  
88 metrics and theory to make generalisations about the genomic basis of adaptations (e.g.,<sup>20</sup>)  
89 and reveal fundamental traits associated with the domestic niche.

90

91 *Rhodnius ecuadoriensis* is the major vector for Chagas disease in Ecuador and Northern  
92 Peru<sup>28</sup>. Both domestic and wild populations of this species exist throughout its range<sup>29</sup>.  
93 Preliminary morphological and genetic evidence suggests some gene flow of *R.*  
94 *ecuadoriensis* between domestic and wild ecotopes<sup>30,31</sup>. By comparison, genetic studies of  
95 *T. cruzi* infecting the same vectors in Ecuador have shown strong to moderate  
96 differentiation between wild and domestic isolates<sup>32,33</sup>. As such there is a lack of a clear  
97 understanding of the micro and macro-evolutionary and ecological forces shaping vector  
98 domestic adaptation and dispersal capabilities, and those of the parasites they transmit.  
99 Morphometric studies have attempted to develop phenotypic markers in triatomines  
100 associated with domestic or wild ecotopes with little (e.g. <sup>34</sup>) to moderate (e.g., <sup>35</sup>) success.  
101 Therefore, domestication in triatomines has become a rather qualitative concept<sup>36</sup> with  
102 urgent need for quantitative foundations.

103

104 Our study represents a first attempt to accurately quantify genomic signatures of  
105 domestication of triatomine species, as well as landscape drivers of vector dispersal. We use  
106 a reduced-representation sequencing approach (2b- RADseq) to recover genome-wide SNP  
107 variation in 272 *Rhodnius ecuadoriensis* individuals collected across ecological gradients in  
108 Loja, Ecuador. We find strong evidence of gene flow between domestic and wild ecotopes  
109 and signatures of local adaptation in some genomic regions. Furthermore, we provide  
110 substantial evidence that triatomine dispersal is fundamentally restricted by landscape  
111 elevation. Our findings suggest frequent and spatially targeted interventions, to cope with  
112 high gene flow and fragmented populations, are necessary to suppress Chagas Disease

113 transmission in Loja. Moreover, discovery of signatures of local adaptation shed the first light  
114 on the genomics basis of domestication in triatomines.

115

## 116 **Results.**

117

118 **Recovery of SNP markers from 272 *Rhodnius ecuadoriensis* SNP specimens.** Our  
119 CspCI-based 2b-RAD protocol was successful in obtaining genome-wide SNP information  
120 for *R. ecuadoriensis*. Sequencing of non-target species was minimal (0.2%) (Supplementary  
121 Figure 1). We genotyped six *Rhodnius prolixus* as controls and 80% of reads mapped to the  
122 *R. prolixus* reference genome. Only 9.5% of *R. ecuadoriensis* reads mapped to the same  
123 reference, a consequence of genomic sequence divergence between *R. ecuadoriensis* and  
124 *R. prolixus*<sup>37</sup>. A stringent genotyping approach confidently identified 2,552 SNP markers  
125 across 272 *R. ecuadoriensis* samples from 25 collection sites, which represented closely  
126 administrative boundaries of human communities. (Supplementary Table 1). In seven  
127 collection sites (Figure 1a; CG, BR, CE, CQ, HY, SJ and GL- seven pairs) triatomines from  
128 both domestic and wild ecotopes were collected. Remaining sites only had individuals of one  
129 ecotope (domestic or wild).

130

131 **Reduced *R. ecuadoriensis* population genetic diversity in domestic ecotopes.** Multiple  
132 genetic diversity estimates among populations from the 25 collection sites in Loja province  
133 were calculated (Observed ( $H_O$ ), and expected ( $H_E$ ) heterozygosity, inbreeding coefficient  
134 ( $F_{IS}$ ) and Allelic Richness ( $A_r$ ); Supplementary Table 2). Sample-size corrected  $A_r$  values  
135 ranged from 1.19 to 1.44 with the lowest values in La Extensa (EX), San Jacinto (SJ), El

136 Huayco (HY) and Santa Rita (RT). In the paired ecotopes within the seven collection sites,  $A_r$   
137 values were higher for wild than domestic triatomine populations in five out of seven  
138 instances, a significant effect observed ( $p < 0.05$ , rarefaction method<sup>38</sup>).

139

140 **Genomic differentiation between domestic and wild ecotopes.** To assay populations  
141 dynamics between sympatric domestic and wild foci, we focused our individual-based  
142 genomic differentiation and pairwise  $F_{ST}$  comparisons analyses on the seven collection sites  
143 for which samples from both ecotopes were available (Figure 1a). Supporting frequent  
144 migration between domestic and wild ecotopes, samples from each ecotope were  
145 interleaved at most collection sites in the phylogenetic tree, with collection site geography,  
146 not ecotope, impacting the tree topology (Figure 1b). As such, samples collected in  
147 Galapagos (GL), Coamine (CE) and Chaquizhca (CQ) formed distinct clusters, and El  
148 Huayco (HY) - San Jacinto (SJ) and Bramaderos (BR) - La Cienega (CG) also grouped  
149 discretely. Five broadly congruent clusters were defined in a discriminant analysis of  
150 principal components (DAPC) (Figure 1c), with geographic collection site rather than their  
151 ecotope again structuring observed diversity.  $F_{ST}$  indices between paired domestic and wild  
152 triatomine samples within each of the seven compared collection sites indicate little  
153 differentiation (e.g.,  $F_{ST} \leq 0.10$ ). Permutation tests indicated that  $F_{ST}$  was significant ( $p <$   
154  $0.05$ ) at only two sites - Bramaderos and El Huayco (Figure 1d). As expected, hierarchical  
155 analysis of molecular variance revealed genetic subdivision was significantly stronger  
156 ( $F_{\text{collection sites/total}} = 0.26$ ,  $p\text{-value} < 0.001$ ) among collection sites than among ecotopes within  
157 collection sites ( $F_{\text{ecotope/collection site}} = -0.004$ ,  $p\text{-value} < 0.001$ ) or among collection year within  
158 communities ( $F_{\text{collection year/collection site}} = 0.06$ ,  $p\text{-value} < 0.001$ ) (Supplementary Table 4).

159

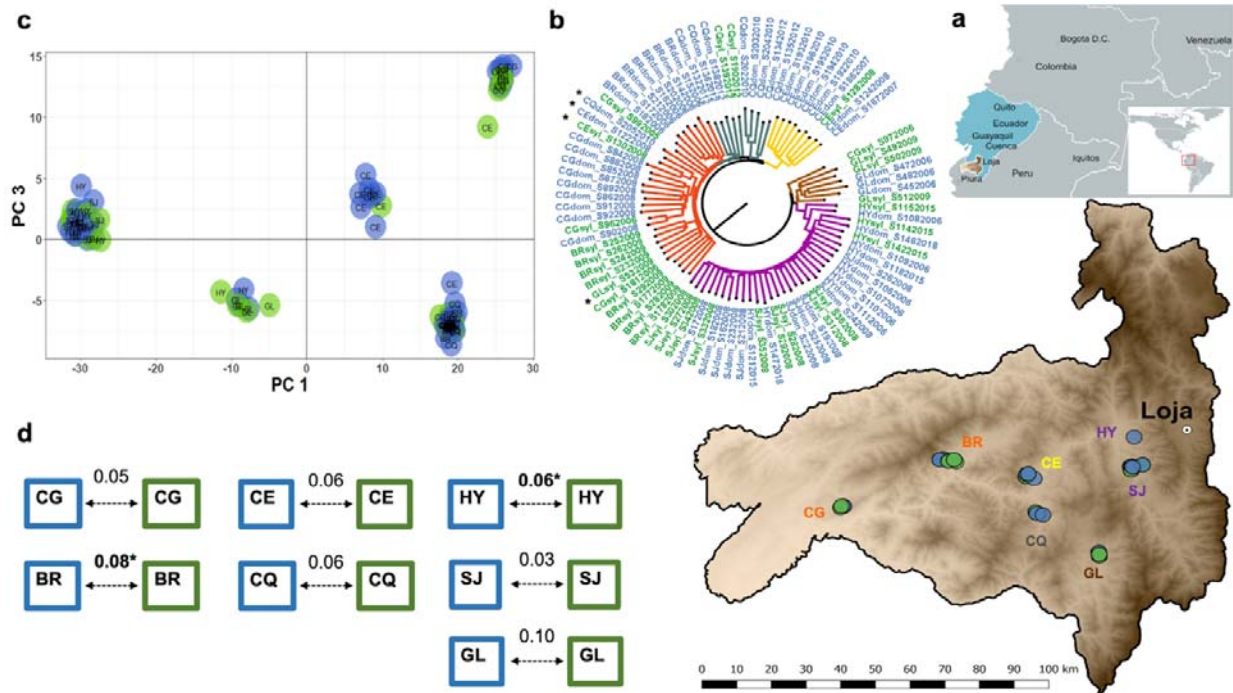

160

161

162 **Figure 1. Genomic differentiation of domestic and wild *R. ecuadoriensis*.** **a**, geographic  
 163 distribution of the seven collection sites with both ecotopes over an elevation surface map of Loja, **b**,  
 164 Neighbor-Joining midpoint phylogenetic tree with phylogenies indicating the Euclidean distance  
 165 between triatomine samples built from allele counts. Tree branches clades are colour-coded to  
 166 approximately differentiate collection sites (or clusters of collection sites) with few samples (black  
 167 asterisks) not conforming to the pattern. **c**, the scatter plot shows five clusters are built with the first  
 168 and third principal components of the discriminant analysis eigenvalues. **d**, pairwise  $F_{ST}$  comparisons  
 169 between domestic (blue box) and wild (green box) *R. ecuadoriensis* in multiple sites across Loja (**a**).  
 170 Significant  $F_{ST}$  values (arrows) after FDR correction are highlighted in bold and an asterisk. In all  
 171 panels, samples location (dots) and labels are colour-coded to indicate their domestic (blue) or wild  
 172 (green) collection ecotope. Collection sites 2-letter ID labels: SJ, San Jacinto; HY, EL Huayco; GL,  
 173 Galapagos; CQ, Chaquizhca; CE, Coamine; BR, Bramaderos; CG, La Cienega (see Supplementary  
 174 Table 1 for full collection sites list).

175

176



177 **Genetic loci correlated with domestic colonisation.** To identify loci associated with  
178 domestic colonisation, we combined a Random Forest (RF) classification approach and  
179 redundancy analyses (RDA) with outlier scans. We included the seven collection sites with  
180 frequent domestic-wild migration and three additional wild-only sites to roughly conform  
181 similar number of domestic (n= 56) and wild (n= 52) samples. A total of 347 SNPs provided  
182 high ranked classification accuracy (mean > 3) across the three RF iterations (inset in Figure  
183 2a). Backwards purging on this highly discriminatory subset of SNPs detected a set of 43  
184 SNPs that minimised the 'Out-of-bag' error rate (OOB-ER) to a minimum of 0.09 and  
185 maximised the discriminatory power among domestic and wild samples (Figure 2a). In a  
186 parallel RDA model, ecotope (domestic / wild) was a predictor explaining approximately  
187 0.4% of the total variation and the constrained axis built from that variation was significant  
188 (p-value < 0.001), and so was the full model as indicated by the Monte Carlo permutation  
189 test. The distribution of each SNP loading/contribution to the RDA significant axis showed  
190 109 candidate adaptive loci as SNPs loadings at  $\pm 2$  SD from the mean of this distribution  
191 (permissive threshold; Figure 2b). In a more conservative approach, we also identified seven  
192 loci from those 109 under very strong selection as represented by those SNPs loading at the  
193 extreme  $\pm 3$  SD (conservative threshold) away from the mean distribution of the constrained  
194 axis (Figure 2b). The arrangement of the individual samples in the ordination space with  
195 relation to the RDA axis showed a clear pattern of subdivision comparable to the ecotope in  
196 which samples were collected (Figure 2c). The 21 loci/SNPs identified as adaptive loci (dark  
197 dots in Figure 2b) by RDA were also detected as highly discriminatory SNPs for domestic  
198 and wild ecotopes in the RF analysis. Assuming 'adaptation with geneflow' we assessed  
199 locus-specific estimates of  $F_{ST}$  (Figure 2d), among the 2552 SNPs between domestic and

200 wild ecotopes and identified one SNP (Locus ID 15732 – purple diamond in Figure 2bd)  
201 likely to be under local adaptation and/or spatial heterogeneous selection as suggested by  
202 OutF flank analysis (Figure 2d left). Moreover, outlier scan with fsthet (Figure 2d right) in the  
203 same subset flagged this OutF flank SNP and 73 additional SNPs showing  $F_{ST}$  higher than the  
204 average neutral loci distribution at a 5% threshold. In summary, 43 SNPs were identified with  
205 the highest classification accuracy in RF analysis. 21 of those SNPs showed some signal of  
206 adaptation (that is, loaded  $\pm 2$  SD away from mean distribution of constrained axis) and 4  
207 were identified showing strong signal of adaptation (that is, loaded  $\pm 3$  SD away from mean  
208 distribution of constrained axis) in RDA analysis. Three of the SNPs flagged as outliers in  
209 fsthet analysis were found also being at high classification accuracy in RF analysis. The  
210 SNP (Locus ID 15732) likely to be under strong selection as identified by OutF flank analysis,  
211 also had a high classification accuracy in RF and, interestingly, it was also identified within  
212 the RDA and fsthet SNPs sets under strong signal of selection.

213

214 **Mapping outlier loci to the *Rhodnius prolixus* genome.** Several SNPs from the different  
215 analyses mapped to annotated regions of the *R. prolixus* genome. One SNP identified in the  
216 RDA analysis mapped (97.1% identity) in a *R. prolixus* genome region containing the  
217 characterised *Krüppel* gap gene (Accession No JN092576.1) involved in embryo  
218 development in arthropods<sup>39</sup>. Three SNPs likely to be under balancing selection identified in  
219 fsthet analysis mapped (100% identity) to regions in the *R. prolixus* genome containing  
220 characterised GE-rich and polylysine protein precursors (mRNA - Accession AY340265.1),  
221 and the *Krüppel* and giant gap genes<sup>39,40</sup> (Accession No HQ853222.1). The former are  
222 important proteins within the salivome of blood-sucking bugs<sup>41</sup> and the latter involved in

223 embryo development<sup>40</sup>. Mapping of the majority of putatively adaptive SNPs, including Locus  
224 ID 15732, was not possible in the absence of an available *R. ecuadoriensis* genome.  
225

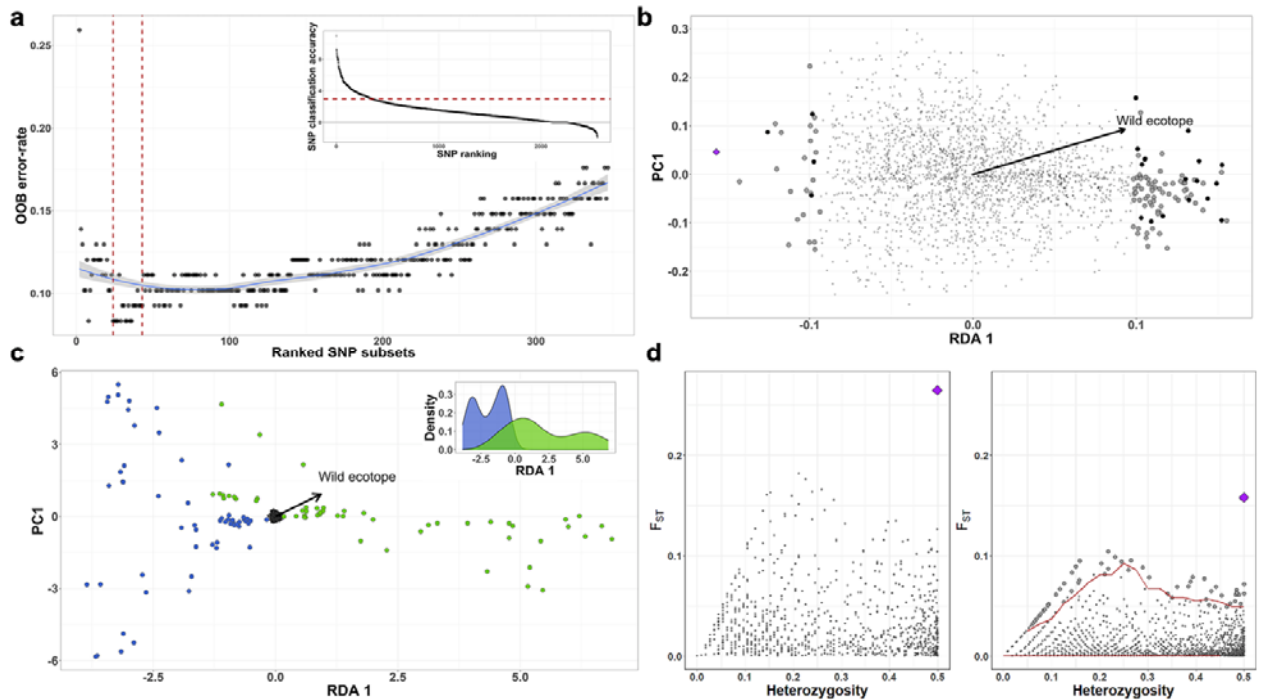

226

227 **Figure 2. Scanning outlier SNP markers for signatures of local adaptation.** a, Random Forest  
228 backwards purging shows subsets with decreasing number of highly discriminatory SNPs and their  
229 resulting OOB-ER. The two vertical red lines indicated the 43 SNPs subset with the lowest OOB-ER  
230 and maximum discriminatory power between domestic and wild ecotopes. The inset shows SNPs  
231 ranked based on their classification accuracy averaged after 3-independent RF runs. SNPs with  
232 classification accuracy above three (red horizontal line) were used for the backwards purging. b, In  
233 our RDA model, SNPs (dots and diamonds) are arranged as a function of their relationship with the  
234 constrained predictor, ecotope (arrow outlines towards a wild ecotope relationship). SNPs closer to  
235 the centre (small grey dots) are not showing relation with the predictor. Adaptive loci/SNPs are  
236 represented by those large dots/diamond loading at  $\pm 2$  SD and  $\pm 3$  SD separated from the mean  
237 SNPs loading distribution. Black large dots (and purple diamond) represent loci/SNP identified with  
238 high classification power in RF analysis. c, a biplot of *R. ecuadoriensis* triatomine samples and SNPs  
239 (small black dots in the centre) are arranged in relation to the constrained RDA axis with an arrow  
240 indicating those related to the wild ecotope. Dots are colour-coded to show sample ecotope of  
241 collection, domestic (blue) or wild (green). Biplot scaling is symmetrical with inset showing the density  
242 function for the RDA axis. d, Scatter plots show OutFlank (left) and fshet (right) SNPs  $F_{ST}$ -

243 heterozygosity relationship. 43 SNPs (large dots) had higher than average  $F_{ST}$  distribution of neutral  
244 loci in fsthet, whereas only one in OutFlank. Purple diamond indicated the SNP (ID 15732) flagged in  
245 all four analyses.  
246

247 **Comparison of dispersal rates of *R. ecuadoriensis* between domestic sites with**  
248 **dispersal rates between wild sites.** Including all samples ( $n = 272$ ) and collection sites ( $n =$   
249  $25$ ), we tested the strength of genetic isolation-by-distance (IBD) initially among domestic  
250 sample collection sites and latterly among wild collection sites (Figure 3). Mantel tests in  
251 both domestic ( $r_m = 0.46$ ,  $p$ -value  $< 0.001$ ) and wild ( $r_m = 0.31$ ,  $p$ -value =  $0.043$ ) ecotopes  
252 strongly supported an effect of geographic distance on genetic distance (Figure 3a). Based  
253 on a generalised least square model (Supplementary Table 5) with maximum likelihood  
254 population effects parametrisation (GLS-MLPE), the effect of geographic distance  
255 significantly stronger ( $0.0018$ ,  $p$ -value  $< 0.001$ ) in wild compared to domestic foci (Figure  
256 3a), suggesting that the rate of vector dispersal occurred at a higher rate between domestic  
257 populations than between wild ones.  
258

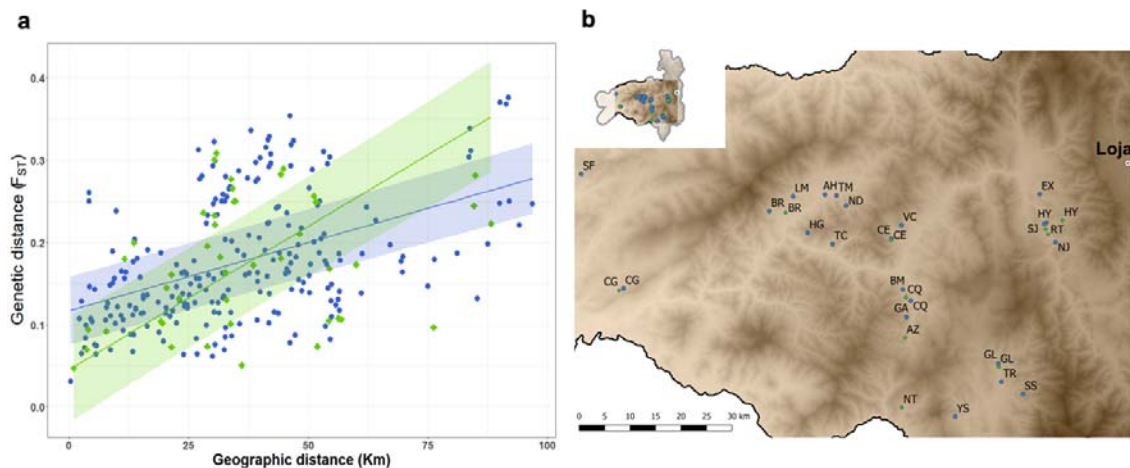

259

260 **Figure 3. Dispersal rate in *R. ecuadoriensis*.** **a**, correlation between pairwise genetic ( $F_{ST}$ ) and  
261 geographic distances (data points) with fitted regression lines (95% CI) for domestic (blue dots) and  
262 wild (green diamonds) ecotopes. Fitted GLS-MLPE model in eqn 1. **b**, geographic distribution of the  
263 25 collection sites across Loja province used for estimating *R. ecuadoriensis* gene flow with  
264 geographic distance. Collection sites 2-letter ID labels: EX, La Extensa; SJ, San Jacinto; HY, EL  
265 Huayco; RT, Santa Rita; NJ, Naranjillo; GL, Galapagos; SS, Santa Rosa; TR, Tuburo; YS, Camayos;  
266 NT, San Antonio de Taparuca; AZ, Ardanza; GA, Guara; CQ, Chaquizhca; BM, Bella Maria; CE,  
267 Coamine; VC, Vega del Carmen; TM, Tamarindo; HG, Higida; ND, Naranjo Dulce; TC, Tacoranga;  
268 AH, Ashimingo; LM, Limones; BR, Bramaderos; CG, La Cienega; SF, San Francisco (SF).  
269

270

271 **Landscape functional connectivity in *R. ecuadoriensis*.** Landscape genomic mixed  
272 modelling aims to identify the effect of different combinations of landscape surfaces and  
273 their parameters on a given genomic differentiation pattern. To obtain an accurate  
274 representation of the genomic differentiation pattern among *R. ecuadoriensis* populations,  
275 we chose Hedrick's  $G_{ST}$  pairwise comparisons (Figure 4b) which corrects for sampling  
276 limited number of populations<sup>42</sup>. The genomic pattern was consistent regardless of metric  
277 used (e.g., Pairwise  $F_{ST}$ <sup>43</sup> and Meirman's standardised  $F_{ST}$ <sup>44</sup>) as revealed by strong and  
278 significant ( $r^2 = 0.99$  &  $0.92$ , respectively;  $p < 0.001$ ) Pearson's correlations. Pairwise  
279 Hedrick's  $G_{ST}$  comparisons showed a strong pattern of population structure across Loja  
280 province with presence of both high and low genetic differentiation among collection sites  
281 (Figure 4ab). San Francisco (SF) and San Antonio (NT) were two examples of clear, and  
282 mutually distinct, outliers in genetic terms. Santa Rita (RT), El Huayco (HY), San Jacinto  
283 (SJ) and La Extensa (EX) were genetically and geographically close but highly differentiated  
284 from the rest. Overall, clusters of collection sites were evident with some differentiation  
285 within and among clusters (Figure 4b).

286

287 The genomic pattern was iteratively regressed with different combinations of landscape  
288 variables and parameters using the ResistanceGA<sup>45</sup> optimisation framework (see Methods).  
289 The optimisation process involves estimating unbiased resistance values for a given  
290 combination of surfaces and select the best (true) model representing the genomic pattern.  
291 To rule out collinearity between landscape variables, we calculated Spearman's correlation  
292 coefficient, rho, between all pairs of surfaces which resulted in small and/or negative (rho <  
293 0.29) correlations (Supplementary Table 8). Similarly, a scatterplot matrix did not show  
294 highly correlated surfaces (Supplementary Figure 11).

295

296 Our three ResistanceGA optimisation replicates (see Methods) showed comparable results.  
297 In all replicates, the single elevation surface showed the lowest AIC<sub>c</sub> values and the highest  
298 AIC<sub>c</sub> weight compared to the other single and composite optimised surfaces (Table 1 is a  
299 replicate example). Delta AIC<sub>c</sub> shows the AIC<sub>c</sub> difference between the elevation surface  
300 (best model) and the rest of the (combination of) surfaces. A difference of ~2.26 units  
301 between elevation surface and a distance-only model was evident which suggests elevation  
302 surface is a better predictor than geographic distance. Optimisation of the elevation surface  
303 parameters confirmed gene flow resistance increases with altitude up to the highest  
304 resistance at approximately 2,400 m.a.s.l. (Supplementary Figure 12).

305

306 To evaluate the robustness of our optimisation procedure and test the effect of uneven  
307 distribution of sample sites, we ran a bootstrap analysis with resampling of the sites at each  
308 iteration. Interestingly, the bootstrap analysis revealed that, when resampling 85% of the  
309 collection sites, the optimised elevation surface model was ranked the top model in only

310 43.2% of the bootstrap iterations compared to 46% of the times in which a distance-only  
 311 model was better (Table 2). The fact that elevation surface was slightly less supported in the  
 312 bootstrap analysis is likely due to the irregular distribution of sites across the study area and  
 313 altitudes. Nevertheless, elevation surface remains the strongest predictor of genetic  
 314 connectivity across the study area (Table 1).

315

316 **Table 1 Model selection results for the generalised mixed-effects models optimised on genetic**  
 317 **distance (Hedrick's  $G_{ST}$ ) for *R. ecuadoriensis*.** For each resistance surface model, number of  
 318 parameters plus the intercept ( $k$ ), Akaike information criterion (AIC), additional parameters corrected  
 319 AIC ( $AIC_c$ ), marginal ( $R^2_m$ ) and conditional ( $R^2_c$ )  $R^2$  values of the fitted MLPE model, log-likelihood  
 320 (LL), delta  $AIC_c$  and  $AIC_c$  weight ( $\omega$ ) are provided.

321

| Resistance surface model       | Type      | $k$ | AIC     | $AIC_c$ | $R^2_m$ | $R^2_c$ | LL     | Delta $AIC_c$ | $\omega$ |
|--------------------------------|-----------|-----|---------|---------|---------|---------|--------|---------------|----------|
| Elevation                      | single    | 4   | -751.51 | -749.51 | 0.41    | 0.72    | 379.76 | 0             | 0.76     |
| Distance                       | single    | 2   | -743.79 | -747.25 | 0.43    | 0.74    | 375.90 | 2.26          | 0.24     |
| Roads                          | single    | 6   | -744.91 | -736.25 | 0.42    | 0.75    | 376.46 | 13.26         | 0.0010   |
| Elevation + Roads              | composite | 9   | -751.55 | -729.55 | 0.42    | 0.72    | 379.77 | 19.96         | 3.49e-05 |
| Land                           | Single    | 12  | -762.26 | -720.26 | 0.52    | 0.81    | 385.13 | 29.25         | 3.35e-07 |
| Elevation + Land cover         | composite | 15  | -763.15 | -687.82 | 0.57    | 0.78    | 385.57 | 61.70         | 3.03e-14 |
| Land cover + Roads             | composite | 17  | -762.06 | -648.63 | 0.56    | 0.78    | 385.03 | 100.88        | 9.37e-23 |
| Null model                     | single    | 1   | -561.25 | -565.08 | 0       | 0.42    | 283.63 | 184.43        | 6.75e-41 |
| Elevation + Land cover + Roads | composite | 20  | -762.44 | -520.44 | 0.55    | 0.78    | 385.22 | 229.08        | 1.36e-50 |

322

323 **Table 2 Summary of bootstrap analysis.** For each resistance surface model, number of parameters  
 324 plus the intercept ( $k$ ), and average (Avg) of the Akaike information criterion (AIC), additional  
 325 parameters corrected AIC ( $AIC_c$ ),  $AIC_c$  weight ( $\omega$ ), rank,  $R^2_m$ , LL, root mean square error (RMSE) and  
 326 frequency the model was top ranked are provided.

327

| Resistance surface model | $k$ | Avg AIC | Avg $AIC_c$ | $\omega$ | Avg rank | Avg $R^2_m$ | Avg LL | Avg RMSE | Top model (%) |
|--------------------------|-----|---------|-------------|----------|----------|-------------|--------|----------|---------------|
| Elevation                | 4   | -535.59 | -533.09     | 0.40     | 1.62     | 0.41        | 271.79 | 0.055    | 43.2          |

|                                       |    |         |         |           |      |      |        |       |      |
|---------------------------------------|----|---------|---------|-----------|------|------|--------|-------|------|
| <b>Distance</b>                       | 2  | -531.44 | -530.78 | 0.60      | 2.33 | 0.42 | 267.72 | 0.055 | 46   |
| <b>Land cover</b>                     | 12 | -526.59 | -487.59 | 4.17e-05  | 3.91 | 0.51 | 275.30 | 0.053 | 10.8 |
| <b>Roads</b>                          | 6  | -523.81 | -517.81 | 0.0008    | 4.18 | 0.41 | 267.91 | 0.055 | 0    |
| <b>Elevation + Roads</b>              | 9  | -525.76 | -509.40 | 2.80e-06  | 4.40 | 0.41 | 271.88 | 0.055 | 0    |
| <b>Elevation + Land cover</b>         | 15 | -521.94 | -425.94 | 1.45e-21  | 5.29 | 0.55 | 275.97 | 0.054 | 0    |
| <b>Land cover + Roads</b>             | 17 | -516.51 | -312.51 | 3.97e-46  | 6.59 | 0.54 | 275.26 | 0.054 | 0    |
| <b>Elevation + Land cover + Roads</b> | 20 | -511.14 | 328.86  | 1.11e-185 | 7.68 | 0.54 | 275.57 | 0.054 | 0    |

328

329

330 To assist with the identification of vector management zones for regional health authorities,  
331 an electrical current map was built by applying a circuit theory algorithm<sup>46,47</sup> on the optimised  
332 elevation surface model (Figure 4c). Specifically, the algorithm simulates the passing of an  
333 electric current across grids (zones) with low/high optimised resistance values. Low  
334 resistance grids are highlighted as high current intensity zones (yellow/light zones in Figure  
335 4c) in which high population connectivity, and therefore high degree of gene flow, is  
336 predicted. The map showed different gradients of connectivity within and among western,  
337 central, eastern and southern Loja province. These included individually isolated populations  
338 (e.g. SF & CG), isolated clusters (e.g. EX; SJ; HY; RT; NJ); as well as well-connected hubs  
339 (e.g., BR-LM, AH-TM-ND, HG-TC and CE-VC).

340



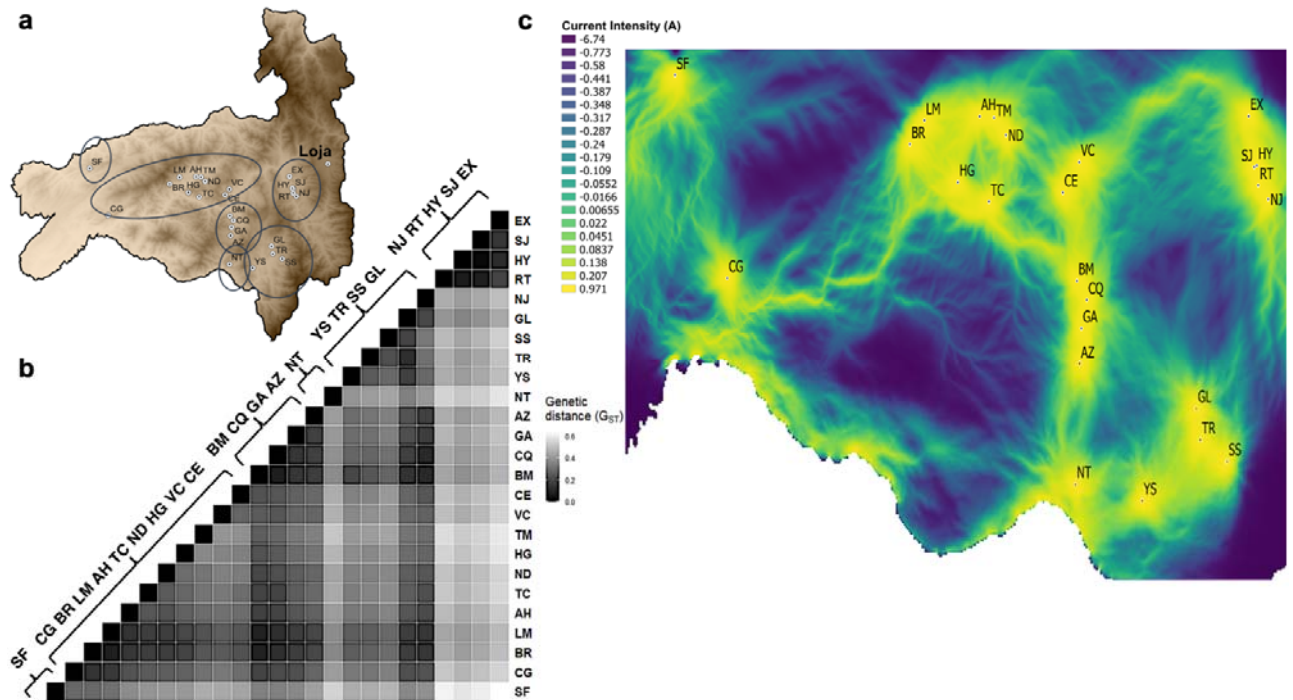

341

342 **Figure 4. Landscape connectivity of *Rhodnius ecuadoriensis* in Loja province, Ecuador.** a, Map  
343 of the geographic location of collection sites across Loja. b, Heatmap shows pairwise genetic  
344 distances ( $G_{ST}$ ) with collection sites ID labels on the right. Clusters and highly differentiated collection  
345 sites are circled in a. Grey scale indicate genetic distance with lighter colours showing higher  
346 differentiation. c, Electrical current map of Loja built from the optimised elevation surface model  
347 showing a gradient of high (yellow/light shade), medium (light greens) and low (blue/dark shade)  
348 functional connectivity across Loja. Clusters of highly connected sites are evident but isolated sites  
349 are also present across regions on Loja. Connectivity within and among clusters and collection sites is  
350 highly influenced by the landscape, specifically elevation surface.

351

352

353

354

355

356

357 **Discussion.**

358

359 In this study we make several core observations: *R. ecuadoriensis* do invade houses from  
360 wild populations, genomic signatures of *R. ecuadoriensis* domestication can be functionally  
361 mapped, and the landscape drivers of vector dispersal can be identified. Consistent with  
362 frequent house invasion, high levels of gene flow between multiple domestic and wild *R.*  
363 *ecuadoriensis* populations were detected by hierarchical analysis. Low and largely non-  
364 significant pairwise  $F_{ST}$  values, as well as interleaved sample clustering based on  
365 phylogenetic and discriminant analyses were also consistent with house invasion.  
366 Significantly elevated allelic richness in wild sites by comparison to nearby domestic foci  
367 clearly confirmed that dispersal occurred most frequently from wild ecotopes into domestic  
368 structures. Genome scans across these parallel domestication events revealed strong  
369 evidence of ‘adaptation with geneflow’, with key outlier loci associated with colonisation of  
370 human-made domestic structures and, presumably, human blood feeding - several of which  
371 mapped to the *R. prolixus* genome. A strong signature of isolation-by-distance (IBD) was  
372 observable throughout the dataset, an effect less pronounced between domestic sites than  
373 between wild foci. Formal landscape genomic analyses revealed elevation surface as the  
374 major barrier to genetic connectivity between populations. Landscape genomic analysis  
375 enabled a spatial model of vector connectivity to be elaborated, informing ongoing control  
376 efforts in the region and providing a model for mapping the dispersal potential of triatomines  
377 and other disease vectors.

378

379 Vector control is the mainstay of Chagas Disease control<sup>11</sup>. Widespread wild reservoir hosts,  
380 as well as a lack of safe treatment options<sup>48,49</sup> and associated healthcare infrastructure,  
381 mean that transmission cannot be blocked by reducing parasite prevalence in human and  
382 animal hosts<sup>50</sup>. Our data indicate that elimination of domesticated *R. ecuadoriensis* in  
383 Ecuador will be frustrated by repeated re-invasion from the wild environment. Similar risks to  
384 effective control are posed by wild *T. infestans* in the southern cone region<sup>12</sup>, *R. prolixus* in  
385 Los Llanos of Colombia and Venezuela<sup>13</sup> and potentially elsewhere in Latin America where  
386 competent vectors are present in the wild environment and nearby domestic locales (e.g., *T.*  
387 *sordida*, *T. maculata*, *R. pallescens* and others<sup>14,15</sup>).

388

389 Understanding evolutionary processes that underpin the colonisation of the domestic  
390 environment by arthropod vectors, and their specialisation to feeding on humans, is required  
391 to characterize their vectorial capacity. Hybrid ancestry in *Culex pipiens*, for example, is  
392 thought to contribute to the biting preference for humans<sup>51</sup>. Human feeding preference can  
393 be rapidly genetically selected for in *Anopheles gambiae*<sup>52</sup>. Specialisation of *Aedes aegypti*  
394 on humans, and resultant global outbreaks of dengue, yellow fever, and Chikungunya  
395 viruses, may be traceable to the emergence of a differential ligand-sensitivity of the odorant  
396 receptor *AaegOr4* in East Africa<sup>2</sup>. In triatomines, the nature of genetic adaptations that have  
397 enabled the widespread dispersal of successful lineages are far from clear. *T. infestans*,  
398 thought to have originated in the Western Andean region of Bolivia, spread rapidly among  
399 human dwellings in the Southern Cone region of South America before its near eradication  
400 in the 1990s<sup>10</sup>. Cytogenetic analyses suggest this early expansion was accompanied by a  
401 substantial reduction in genome size<sup>53</sup>, but the adaptive significance such a change is not

402 clear. The advantage of the *R. ecuadoriensis* system we describe is that it captures multiple  
403 parallel adaptive processes and; therefore, can assist in the identification of common  
404 evolutionary features associated with colonisation of the domestic environment. Despite  
405 limited genomic coverage, and with no *R. ecuadoriensis* reference genome available, we  
406 mapped outlier loci to genes in the *R. prolixus* draft genome, and found they are related to  
407 salivary enzyme production<sup>41</sup>, as well as embryonic development<sup>39</sup>. Although these genes  
408 may have a role in domestic adaptation in triatomines, genome-wide association studies or  
409 quantitative trait locus mapping approaches are necessary to fully reveal the genomic  
410 architecture of adaptation to the domestic setting. Nevertheless, these findings motivate us  
411 to investigate further putative genes involved in local adaptation to the domestic environment  
412 such as blood-feeding<sup>54</sup>, sensory cues and host-seeking behaviour<sup>25,55</sup>, as well as human  
413 blood detoxification<sup>54,56</sup>. Recent data from our group in Loja province shows that, without  
414 doubt, domestic *R. ecuadoriensis* feed extensively on human blood<sup>57</sup>.

415

416 Our analyses identified a strong signal of genetic IBD among *R. ecuadoriensis* populations  
417 across our study area. Geographic partitioning at this scale is consistent with limited  
418 autonomous dispersal capabilities of triatomines which, are, in the main, poor fliers<sup>58</sup>. Wind-  
419 blown dispersal observed in smaller vector species is unlikely in triatomines<sup>59</sup>. Passive  
420 dispersal of triatomine vectors alongside the movements of their human hosts, which  
421 certainly underpins the successful dispersal of other domesticated vector species, is more  
422 likely (e.g., *Aedes spp.*<sup>60,61</sup>). Lower IBD observed among domestic than wild settings may be  
423 consistent with passive dispersal alongside humans. We observed a similar phenomenon  
424 among parasite isolates from the same region in a previous study<sup>32</sup>. Nonetheless, our formal

425 exploration of the landscape drivers of vector dispersal did not reveal an important effect of  
426 roads, and it is not clear to what extent human dispersal of vectors takes place based on our  
427 data alone.

428

429 According to our landscape genomic analysis, elevation surface is a key predictor of  
430 connectivity/discontinuity among *R. ecuadoriensis* populations. Our machine learning (ML)  
431 optimisation procedure provides objective parameterisation of altitude resistance values to  
432 *R. ecuadoriensis* gene flow<sup>62</sup>. Based on our landscape model predictions we were able to  
433 construct a electric current map (Figure 4c) to assist medical entomologists and policy  
434 makers in understanding vector dispersal routes. Current vector control strategies in Loja  
435 target a single civic administrative unit (neighbourhood or town) for any given insecticidal  
436 intervention<sup>28</sup>. Our data and model suggest this approach may be effective for certain  
437 communities (e.g., SF, CG, NT and YS, Figure 4). However, for highly connected hubs (e.g.  
438 BM, GA, CQ, AZ), successful longer term triatomine control (e.g., insecticide spraying,  
439 house improvement, window nets, etc.) will depend on simultaneous intervention in multiple  
440 connected communities.

441

442 In Ecuador, as with many other endemic regions in Latin America, efforts to control Chagas  
443 disease may be complicated in the long term by substantial wild populations of secondary  
444 triatomine vectors<sup>16</sup>. As with many other vector borne diseases, there is also a strong case  
445 for the use of integrated vector management (IVM) for Chagas disease, where  
446 improvements to housing, education, community engagement, in addition to bed net use and  
447 insecticide spraying are all likely to be necessary to achieve sustained control<sup>28,63</sup>. Our data

448 clearly indicate that triatomines do invade houses in Loja and low-lying valleys provide  
449 routes for vector dispersal between communities and cost-effective IVM must be  
450 underpinned by this understanding of vector population structure. Fortunately, genomic and  
451 analytical tools can now furnish much of the detail, although better genomic resources for  
452 secondary triatomine vector species are required to reveal the process of vector adaptation  
453 to the human host. Targeting secondary vector species must now be a priority for health  
454 authorities, as these now represent the most pernicious and persistent barrier to controlling  
455 residual Chagas disease transmission.

456

## 457 **Methods.**

458

### 459 **Sample collection and study area.**

460

461 *Rhodnius ecuadoriensis* triatomine bugs (Supplementary Table 1) were derived from a larger  
462 collection in the Center for Research on Health in Latin America (CISEAL) of Pontificia  
463 Universidad Católica del Ecuador (PUCE). *Rhodnius prolixus* samples (n=6) were provided  
464 by the London School of Hygiene and Tropical Medicine and sequenced as an outgroup, as  
465 well as to assist with the decontamination of the of 2b-RAD reads and their mapping to  
466 functional regions in the draft *R. prolixus* genome<sup>24</sup>. *R. ecuadoriensis* individuals were  
467 collected using the one-hour-man method during field surveys across Loja, Ecuador from  
468 2004 to 2018<sup>28</sup>. The triatomines were collected under Ecuadorian collection permits: N° 002–  
469 07 IC-FAU-DNBAPVS/MA; N° 003–2011-IC-FAU-DLP-MA; N° 006-IC-FAU-DLP-MA-2010;  
470 N° 010-IC-FAN-DPEO-MAE; N° 011–2015- IC-INF-VS-DPL-MA; MAE-DNB-CM-2015-0030

471 and internal mobilization guide N° 001-2018-UPN-VS-DPAL-MAE and N° 017-2018-UPN-  
472 VS-DPAL-MAE, All these samples were exported to the University of Glasgow by the  
473 scientific export authorization N°70-2018-EXP-CM-FAU-DNB/MA.

474

475 A widespread spatial sampling (Supplementary Figures 8, 9 and 10) of ecotopes (e.g.,  
476 domestic and wild), altitudes (up to 1542.9 m.a.s.l.), vegetation types (e.g., tree/bush forest,  
477 cropland, etc.) and sites adjacent to different road infrastructure (e.g., highways, tertiary  
478 roads, etc.) was carried out in the study area.

479

#### 480 **Genomic DNA extraction and sequencing.**

481

482 Genomic DNA (gDNA) was extracted in 88.2% (502/443) of the samples using a SSNT/Salt  
483 precipitation method<sup>64</sup> previously applied in triatomine bugs<sup>65</sup>. For each sample, gDNA  
484 concentration was > 25 ng/uL and 288.4 ng/UL (sd. ± 241.8) on average with purity ratios  
485 (260/280 and 260/230) of 1.87 (sd. ± 0.10) and 2.30 (sd. ± 0.97), respectively. gDNA was  
486 digested with the CspCI Type IIB restriction enzyme (IIB-REase - New England BioLabs,  
487 Inc.) which has shown to yield a high marker density in triatomine<sup>65</sup>. DNA fragments (36bp)  
488 were ligated to Illumina single-end adaptors and a specific barcode added during PCR  
489 amplification to construct 382 150bp 2bRAD libraries<sup>66</sup>. Libraries were homogenised to an  
490 approximate similar concentration, purified with magnetic beads<sup>67</sup> and pooled in two  
491 separate batches (n = 191). Each batch was sequenced separately on 1-flowcell (2 lanes)  
492 HiSeq 2500 (Illumina) Rapid Mode platform with a single-end (1x50 bp) setup using v2 SBS

493 chemistry at the Science for Life Laboratory (SciLifeLab, Stockholm, Sweden), which also  
494 implemented the reads demultiplexing and their in-house quality-filtering.

495

496 **Bioinformatics of 2b-RAD sequenced data.**

497

498 **Data cleaning and decontamination.** Demultiplexed raw data quality scores were verified  
499 in FastQC software v0.11.9 (<http://www.bioinformatics.babraham.ac.uk/projects/fastqc/>).  
500 2.3% (16/689) Million reads (Mreads) were removed due to incomplete CspCI restriction site  
501 (36 bp) and having across read quality score below 30<sup>68</sup>. The 624.7 high quality Mreads with  
502 integrate restriction site had their Illumina adaptors and barcodes trimmed, and reads were  
503 forwarded (5'-3') using custom scripts. To exclude non-target sequences (Supplementary  
504 Methods 1.1), 1.2 Mreads (0.2%) reads mapping to bacteria, virus, archaeal, *Trypanosoma*  
505 *cruzi*<sup>69</sup> and *homo sapiens* (Genome Reference Consortium human build 38) genomes were  
506 removed using DeconSeq standalone v4.3<sup>70</sup> with an alignment identity threshold of 85% and  
507 Kraken<sup>71</sup> taxonomic classifier (Supplementary Figure 1). After decontamination, each sample  
508 yield on average 1.6 Million reads (interquartile range = 1.9 Mreads).

509

510 **Optimisation and genotyping.** As advised in refs.<sup>72,73</sup>, we optimised (Supplementary  
511 Methods 1.1) STACKS v2.55<sup>74</sup> DENOVO\_MAP.PL programme by varying at a time one of  
512 the main controlling parameters (-m, -M and -n; Supplementary Table 2) on each run while  
513 keeping the rest of the parameters at the setting used in early experiments (e.g., -m 5, -M 2,  
514 -n 1, -N 4, -alpha 0.01, -bound\_low 0, -bound\_high 0.01, -r 0.8, -min\_maf 0.01<sup>65</sup>). The  
515 parameter combination yielding the highest number of SNPs with the least missing data and



516 genotyping error rate was chosen to be the optimal set. Genotypes below a quality score of  
517 30, and samples with above 50% missing genotypes across sites and among loci were  
518 removed from downstream analysis using the VCFtools software suite v0.1.5<sup>75</sup>. The  
519 remaining missing genotypes (< 0.5%) were imputed using the k-nearest neighbour  
520 genotype imputation (LDkNNi) method<sup>76</sup> implemented in the TASSEL software v5<sup>77</sup>.

521

## 522 **Genomic differentiation between domestic and wild ecotopes**

523

524 **Genetic diversity and linkage disequilibrium.** Genetic diversity measures (e.g., observed  
525 ( $H_o$ ) and expected heterozygosity ( $H_E$ ), inbreeding coefficient ( $F_{IS}$ ) and percentage of loci in  
526 Hardy-Weinberg equilibrium (% HWE)) were calculated for each collection site, and  
527 ecotopes (domestic and wild) within collection sites, in the HIERFSTAT<sup>78</sup> and pegas<sup>79</sup>  
528 packages in R<sup>80</sup>. Sample-size corrected Allelic richness ( $A_r$ ) was calculated using the  
529 rarefaction method<sup>38</sup> implemented in the PopGenReport<sup>81</sup> R package. To evaluate the  
530 percentage of SNP markers in linkage disequilibrium (LD), correlation coefficient ( $r^2$ )  
531 estimates were calculated between markers pairs using using the GUS-LD R package<sup>82</sup>  
532 which revealed a very low percentage (< 0.20%). To observe whether genetic diversity  
533 difference between ecotope pairs was significant, a permutation-based (10,000  
534 permutations) two sample t-test was performed on each pair diversity values using the  
535 RVAideMemoire R package (<https://www.rdocumentation.org/packages/RVAideMemoire>).

536

537 **Individual-based genomic differentiation.** Genomic differentiation among *R.*

538 *ecuadoriensis* domestic and wild samples within a subset of seven collection sites was

539 visualised in a neighbour-joining midpoint tree<sup>83</sup> (Figure 1b) built from Euclidean genetic  
540 distances of allele frequencies with the ape<sup>84</sup> R package. Tree components were edited in  
541 FigTree software v1.4.3 (<http://tree.bio.ed.ac.uk/software/figtree/>) to better illustrate domestic  
542 and wild samples and their overall clustering pattern. To explore samples genomic  
543 differentiation further, a DAPC<sup>85</sup> was performed in the same seven collection sites with the  
544 adegenet<sup>86</sup> R package (Figure 1c). The most likely *a priori* number of clusters was chosen  
545 based on the lowest Bayesian information criterion (BIC). In the DAPC, all principal  
546 components (PCs) and the eigenvectors of the first three DA discriminant functions were  
547 kept for visualizing the samples individual coordinates of different PCs linear combinations  
548 (Supplementary Figure 5).

549

550 **Pairwise  $F_{ST}$  comparisons.** To support previous hierarchical analyses, pairwise  $F_{ST}$   
551 comparisons<sup>43</sup> were performed between *R. ecuadoriensis* from domestic and wild ecotopes  
552 within the seven collection sites (Figure 3b). In this study,  $F_{ST}$  was exploited as a measure of  
553 genomic connectivity (flow) between ecotopes within given collection sites. Specifically, Nei's  
554  $F_{ST}$ <sup>87</sup> pairwise comparisons were computed in adegenet R package and tested at 5%  
555 significance via 999 permutations of individuals selected randomly within and between  
556 groups. P-values were corrected for multiple comparisons using the false discovery rate  
557 (FDR) method<sup>88</sup> in the function p.adjust of the stats R package<sup>80</sup>.

558

559 **Hierarchical F-statistics.** *R. ecuadoriensis* molecular variation was explored at a four-level  
560 (e.g., among collection sites, among ecotopes (domestic or wild) within collection sites,  
561 among collection year within collection sites and among individuals within populations)

562 hierarchy of population structure. For each hierarchy, a F-statistic (with 95% C.I.) was  
563 calculated, and its significance tested via 999 randomised permutations with the  
564 HIERFSTAT R package. For comparison and given not all sites had both ecotopes, two  
565 hierarchical analysis were performed, one with the total collection sites ( $n = 25$ ) and the  
566 other with a subset of collection sites ( $n = 7$ ) with samples collected in both ecotopes  
567 (Supplementary Table 4).

568

#### 569 **Domestic-wild SNP association analyses.**

570

571 As a response of *R. ecuadoriensis* ecotopes fluxes in multiple collection sites across Loja,  
572 we screened for SNP RADseq markers under a strong signal of selection (outlier loci). The  
573 power for detecting outlier loci of four different approaches, Random Forest (RF) machine  
574 learning (ML) classification algorithm (implemented in refs.<sup>89-91</sup>), redundancy analysis (RDA)  
575 constraint ordination<sup>92</sup>, and OutFlank<sup>93</sup> and fsthet<sup>94</sup>  $F_{ST}$ -outlier methods, was evaluated using  
576 a roughly similar number of domestic ( $n= 56$ ) and wild ( $n= 52$ ) *R. ecuadoriensis* across Loja  
577 province sharing a total of 2552 SNPs.

578

579 **Random Forest.** The RF algorithm<sup>95</sup> implemented in the randomForest<sup>96</sup> R package was  
580 used to build a series of recursive decision trees, or forest, to classify domestic and wild *R.*  
581 *ecuadoriensis* based on their shared SNPs (predictors) covarying to a specific ecotope  
582 (response variable) (Supplementary Figure 6). Within each RF run, decision trees were  
583 trained by random subsampling with replacement 66.6% of triatomine samples (training  
584 dataset), for which aleatory selected SNPs were top-ranked classifiers when minimizing the

585 most within-ecotope variation (that is, partitioning triatomine by ecotope). Trained trees  
586 predictive power was tested with the remaining 33.3% triatomine samples ('Out-of-bag' test  
587 dataset) in which ecotope misclassification of samples estimated an OOB-ER for that RF  
588 run; SNPs importance classification accuracy was averaged among the total number of trees  
589 created in a given RF. Three independent (spatial structure-corrected) RFs with 100,000  
590 trees were run and their convergence on SNPs importance classification accuracy was  
591 evaluated by Pearson's correlation test. Top-ranked SNPs (Figure 2a inset) among the three  
592 RFs (that is, importance classification accuracy above 3) were chosen for backwards  
593 purging, as implemented in refs.<sup>90,97</sup>. Backwards purging (Figure 2a) iteratively runs RFs  
594 starting with the full top-ranked SNPs and discarding the least important ones before the  
595 next iteration until only two were left. The subset with the lowest OOB-ER contained SNPs  
596 outlying strongly for the ecotope response.

597

598 **Redundancy analysis.** Outlier loci likely under selection were also identified using RDA  
599 multivariate constrained ordination<sup>98</sup> implemented in the *vegan*<sup>99,100</sup> R package. First, a  
600 matrix fitted values (Supplementary Figure 7a) were obtained using multivariate linear  
601 regression between a matrix of genotypes (response) and ecotopes (explanatory) with an  
602 additional term controlling for spatial structure (based on the three first axes of an individual  
603 principal coordinates of each sample). Then, principal component analysis (PCA) on the  
604 fitted values matrix resulted in a constrained axis composed from the variation explained,  
605 'redundancy', by our explanatory variable (Supplementary Figure 7b). Overall RDA model  
606 and variation explained by the constrained RDA axis were tested for significance via 999  
607 permutations designed for constrained correspondence analysis. Additionally, SNPs

608 coordinates were scaled and plotted in the ordination space to see their relationship with the  
609 constraint axis, ecotope (Supplementary Figure 7c and Figure 2b). SNPs z-transformed  
610 loadings (Supplementary Figure 7d) separated by  $\pm 2$  and  $\pm 3$  standard deviations  
611 (permissible and conservative thresholds, respectively) from the mean distribution of the  
612 total SNPs loadings in our RDA axis were considered under selection (Figure 2b) (for further  
613 details on RDA see refs.<sup>92,101,102</sup>).

614

615 **F<sub>ST</sub>-Heterozygosity outlier method.** The F<sub>ST</sub>-Heterozygosity outlier method aims to identify  
616 loci with strong allele differences among ecotopes. First, ecotope differentiation for each  
617 locus is calculated using Wright's F<sub>ST</sub> without sample correction. The distribution of these  
618 values is expected to have a chi-squared shape. The main goal is inferring a null F<sub>ST</sub>  
619 distribution from neutral loci not strongly affected by diversifying selection<sup>93</sup>. Therefore, a  
620 best-fit to the chi-squared F<sub>ST</sub> distribution was achieved by trimming the lowest and highest  
621 F<sub>ST</sub> values (loci in the tails of the distribution are likely to be under effective diversifying  
622 selection) and considering only the values in the centre (neutral loci and loci experiencing  
623 spatial uniform balancing selection). Loci with unusual F<sub>ST</sub> values relative to this fitted  
624 distribution can be thought of experiencing additional diversifying selection<sup>93,94</sup>. We used two  
625 R packages to accomplish this analysis, OutFlank<sup>93</sup> and fsthet<sup>94</sup>, and compared the results  
626 (Figure 2d). The difference between the packages is that fsthet uses smoothed quantiles of  
627 the empirical F<sub>ST</sub>-Heterozygosity distribution to identify outlier loci and does not assume a  
628 particular distribution or model of evolution as compared to OutFlank. We set OutFlank  
629 function with proportion of lower and upper loci trimmed to 0.06 and 0.35, respectively, and  
630 the rest of the values to default.

631

632 **Mapping SNP outlier loci.** In order to identify genes that may be responsible for local  
633 adaptation in the Chagas disease vector, *R. ecuadoriensis*, to the domestic environment we  
634 mapped the SNPs found in the association analyses to the *R. prolixus* annotated genome<sup>24</sup>.  
635 We used the BWA alignment tool implemented in DeconSeq software v0.4.3<sup>70</sup> to map SNPs  
636 sequences (38 bp) at a minimum alignment threshold of 85. The sequences of the regions  
637 (60-300kb) in which our SNPs aligned were BLAST searched and compared to the *R.*  
638 *prolixus* genome.

639

640 **Estimating gene flow with distance.** Matrices of genetic ( $F_{ST}$ <sup>87</sup>) and geographic (Km)  
641 distances between the 25 collection sites, and between domestic and wild collection sites  
642 separately, were obtained with the adegenet and raster<sup>103</sup> R packages, respectively. Mantel  
643 tests<sup>104</sup> were performed on those matrices using the ecodist<sup>105</sup> R packages. Genetic and  
644 geographic correlation between domestic and wild ecotopes was also viewed separately by  
645 fitting a generalised least square (GLS) model with a maximum likelihood population effects  
646 correction (MLPE)<sup>106</sup> implemented in the corMLPE (<https://github.com/nspope/corMLPE/>) R  
647 package and assuming a linear relationship

648

$$649 \quad Y_{ij} = \alpha + \beta(X_{ij} - \bar{x}) + H_i + \tau_{ij} + e_{ij} \quad (\text{eqn1})$$

650

651 between two distance matrices based on genetic and geographic distance measures, Y and  
652 X, respectively. Centring the  $X_{ij}$  in about its mean,  $\bar{x}$ , removes the correlation between the

653 estimates of  $\alpha$  and  $\beta^{106}$ .  $H_i$  determines the ecotope and the  $\tau_{ij}$  term adds the MLPE random  
654 effect correlation structure.

655

#### 656 **Estimating gene flow with resistance.**

657

658 **Genetic distances.** Given genomic differentiation between domestic and wild ecotopes was  
659 low, we combined all samples within a collection site and used collection site as the unit in  
660 our landscape genetic analysis. Collection site units are logistically and budgetary important  
661 when carrying out triatomine surveys and insecticide spraying. Using a landscape genomics  
662 mixed modelling framework (Supplementary Figure 2), we aimed to disentangle the effects  
663 of landscape heterogeneity on *R. ecuadoriensis* population structure and gene flow. A  
664 Hedrick's  $G_{ST}^{42}$ , which corrects for sampling limited populations<sup>107</sup>, distance matrix among  
665 the 25 collection sites was obtained in the GenoDive v3.04<sup>108</sup> software. In addition, we ran a  
666 Pearson's correlation test between the Hedrick's  $G_{ST}$  matrix, and Meriman's standardised  
667  $F_{ST}^{44}$  and  $F_{ST}^{43}$  matrices, calculated in the same software, to evaluate the consistency of  
668 genomic differentiation pattern among collection sites with different genetic distance  
669 measures.

670

671 **GIS data collection and preparation.** Three landscape variables (elevation, land cover and  
672 road network - hereafter, surfaces) were hypothesized to influence *R. ecuadoriensis*  
673 dispersal and gene flow (Supplementary Figures 8, 9 and 10). For the continuous surfaces  
674 (elevation surface), only monomolecular transformations (e.g., Supplementary Figure 12ab)  
675 with any possible shape and maximum parameters were explored to assume a linear

676 relationship in which gene flow decreases as altitude increases as hypothesised in other  
677 triatomine species<sup>109</sup>. Our categorical surfaces, land cover and road network, were  
678 reclassified as follows. Highly fragmented land cover categories (e.g., cultivated and  
679 managed areas) produced the least resistance to gene flow, whereas regular flooded areas  
680 and water bodies were barriers. Habitat fragmentation and human agricultural activities has  
681 been shown to affect triatomine populations dynamics<sup>110</sup>. Human-mediated passive  
682 triatomine dispersal has been suggested elsewhere<sup>11</sup>, and therefore, we assumed roads  
683 would connect humans populations, and likely triatomines by passive carriage. High  
684 transitable roads (e.g., highways and tertiary roads) had the least resistant values, whereas  
685 absence of roads was a strong barrier (see Supplementary Table 9 & Supplementary Table  
686 10). Original GIS surfaces were obtained from multiple sources (Supplementary Table 6)  
687 and transformed to have the same format (raster), resolution (250 m<sup>2</sup> grid), extent (~ 97 Km<sup>2</sup>)  
688 and coordinate reference system (Universal Transverse Mercator (UTM)).  
689 Spearman's rank correlation coefficient ( $\rho$ ) tests were run (Supplementary Table 8) and  
690 plotted (Supplementary Figure 11) on each pair of surfaces to ensure variables were  
691 uncorrelated ( $\rho < 0.29$  based on Cohen<sup>111</sup>). All three surfaces original values were  
692 transformed to the same scale (i.e., a minimum value of 1 and a maximum of 100) to meet  
693 our initial hypothesis.

694

695 **ResistanceGA principle.** The genetic algorithm<sup>112</sup> implemented in the R package,  
696 ResistanceGA<sup>45</sup>, was used for multiple and single-surface optimization of resistance values  
697 to gene flow in the above surfaces (Supplementary Figure 3). Briefly, ResistanceGA method  
698 is a powerful, flexible, stochastic and assumption-free framework based on an evolutionary



699 ML process that finds unbiased optimal resistance parameters (resistance weights values for  
700 a given surface) in space that best fits the genomic structure pattern<sup>113</sup>. The method works  
701 by correlating genomic (response) and effective (predictor) distances (derived from a  
702 random-walk commute time algorithm<sup>114</sup> – Supplementary Figure 4b) matrices through a  
703 maximum likelihood population effects<sup>106</sup> model and, on each iteration, evaluates the best  
704 resistance parameters based on a ML objective function, log-likelihood in our case.  
705 Simulating the process of evolution on each iteration, the best model and parameters are  
706 selected and pass over the next generation with some random change on parameter values  
707 to explore the parameter space widely.

708

709 **Multiple surface optimisation.** We performed three replicate runs to optimise all possible  
710 combinations of our surfaces (hereafter, composite surfaces), including surfaces individually  
711 (hereafter, single surfaces) to generate models with optimised resistance values. The major  
712 GA algorithm options were set to default, except for the 'pop.mult' which was set to 20 to  
713 increase the number of parameters to evaluate on each surface every iteration. All  
714 optimisation processes were run in parallel with 10-20 cores in a Debian cluster  
715 (<http://userweb.eng.gla.ac.uk/umer.ijaz/#orion>) at the University of Glasgow. Running times  
716 varied from days to weeks depending on surface size and number combined at a time.

717

718 **Model selection.** Composite and single surface models, including an intercept- only (null  
719 model) and a geographic distance (resistance grid cells are set to 1 to model isolation-by-  
720 distance) model were evaluated (Table 1) and the best model was selected based on the  
721 lowest AIC<sub>c</sub>, AIC<sub>c</sub> weight and Delta AIC<sub>c</sub>. To confirm the robustness of the optimisation

722 surfaces and controlling for potential bias due to uneven distribution of sample locations in  
723 the landscape, we carried out bootstrap resampling (10,000 iterations) in 85% of our sample  
724 locations and then fit the subset to each of the effective distance matrices from the optimised  
725 surfaces. After the bootstrapping analysis, the average  $AIC_c$  among all iterations and the  
726 percentage a model was top over all iterations was used as a criterion to rank the best  
727 model (Table 2).

728

729 **Landscape connectivity model.** We used the best optimised single (elevation surface)  
730 resistance surface models to estimate landscape connectivity through a circuit theory  
731 algorithm<sup>46,47</sup> (Supplementary Figure 4) implemented in the software CIRCUITSCAPE v5<sup>115</sup>.  
732 Here, our resistance surfaces were converted into electric networks (Supplementary Figure  
733 4c) in which each grid cell represented a node connected to their neighbours by resistors of  
734 different weight. Resistor weights were calculated from the average resistance values (i.e.,  
735 optimised resistance values) of the two grid cells being connected. The algorithm applies a  
736 simulated electric current between all pairs of focal nodes (collection sites) in the network to  
737 estimate effective distances between them. A current density map (Figure 4c) was obtained  
738 from those resistance distance estimations representing a random walk probability of  
739 movement through our study area.

740

#### 741 **Data availability**

742 Raw sequenced data will be uploaded to the Sequence Read Archive (SRA) repository on  
743 publication.

744

745 **Materials & Correspondance**

746 Correspondance to Martin Llewellyn and Luis Enrique Hernandez Castro

747

748 **Code availability**

749 Code for population, assosiation and landscape genomics analyses will be available

750 via Github repository ([github.com/lehernandezc/recuadoriensis](https://github.com/lehernandezc/recuadoriensis)) on publication.

751

752 **References**

753

- 754 1. Powell, J. R. & Tabachnick, W. J. History of domestication and spread of *Aedes*  
755 *aegypti*--a review. *Memórias do Instituto Oswaldo Cruz* vol. 108 11–17 (2013).
- 756 2. McBride, C. S. *et al.* Evolution of mosquito preference for humans linked to an  
757 odorant receptor. *Nature* **515**, 222–227 (2014).
- 758 3. Leftwich, P. T., Bolton, M. & Chapman, T. Evolutionary biology and genetic  
759 techniques for insect control. *Evolutionary Applications* vol. 9 212–230 (2016).
- 760 4. Powell, J. R. An Evolutionary Perspective on Vector-Borne Diseases. *Front. Genet.*  
761 **10**, 1266 (2019).
- 762 5. Manel, S. & Holderegger, R. Ten years of landscape genetics. *Trends Ecol. Evol.* **28**,  
763 614–621 (2013).
- 764 6. Vreysen, M. J. B. *et al.* Sterile Insects to Enhance Agricultural Development: The  
765 Case of Sustainable Tsetse Eradication on Unguja Island, Zanzibar, Using an Area-  
766 Wide Integrated Pest Management Approach. *PLoS Negl. Trop. Dis.* **8**, e2857 (2014).
- 767 7. Schwabl, P. *et al.* Prediction and Prevention of Parasitic Diseases Using a Landscape  
768 Genomics Framework. *Trends Parasitol.* (2016) doi:10.1016/j.pt.2016.10.008.
- 769 8. Hemming-Schroeder, E., Lo, E., Salazar, C., Puente, S. & Yan, G. Landscape  
770 Genetics: A Toolbox for Studying Vector-Borne Diseases. *Front. Ecol. Evol.* **6**, 21  
771 (2018).
- 772 9. WHO. WHO Chagas disease (American trypanosomiasis). [https://www.who.int/news-](https://www.who.int/news-room/fact-sheets/detail/chagas-disease-(american-trypanosomiasis))  
773 [room/fact-sheets/detail/chagas-disease-\(american-trypanosomiasis\)](https://www.who.int/news-room/fact-sheets/detail/chagas-disease-(american-trypanosomiasis)) (2021).
- 774 10. Schofield, C. J. & Dias, J. C. The Southern Cone Initiative against Chagas disease.  
775 *Adv. Parasitol.* **42**, 1–27 (1999).

- 776 11. Hashimoto, K. & Schofield, C. J. Elimination of *Rhodnius prolixus* in Central America.  
777 *Parasit. Vectors* **5**, 45 (2012).
- 778 12. Ceballos, L. A. *et al.* Hidden Sylvatic Foci of the Main Vector of Chagas Disease  
779 *Triatoma infestans*: Threats to the Vector Elimination Campaign? *PLoS Negl. Trop.*  
780 *Dis.* **5**, e1365 (2011).
- 781 13. Fitzpatrick, S., Feliciangeli, M. D., Sanchez-Martin, M. J., Monteiro, F. A. & Miles, M.  
782 A. Molecular genetics reveal that silvatic *Rhodnius prolixus* do colonise rural houses.  
783 *PLoS Negl. Trop. Dis.* **2**, e210 (2008).
- 784 14. Rodríguez-Planes, L. I., Gaspe, M. S., Enriquez, G. F. & Gürtler, R. E. Habitat-  
785 Specific Occupancy and a Metapopulation Model of *Triatoma sordida* (Hemiptera:  
786 Reduviidae), a Secondary Vector of Chagas Disease, in Northeastern Argentina. *J.*  
787 *Med. Entomol.* **55**, 370–381 (2018).
- 788 15. Cantillo-Barraza, O., Chaverra, D., Marcet, P., Arboleda-Sánchez, S. & Triana-  
789 Chávez, O. *Trypanosoma cruzi* transmission in a Colombian Caribbean region  
790 suggests that secondary vectors play an important epidemiological role. *Parasites and*  
791 *Vectors* **7**, (2014).
- 792 16. Grijalva, M. J., Villacís, A. G., Ocaña-Mayorga, S., Yumiseva, C. A. & Baus, E. G.  
793 Limitations of selective deltamethrin application for triatomine control in central coastal  
794 Ecuador. *Parasites and Vectors* **4**, 20 (2011).
- 795 17. Villacís, A. G. *et al.* Would tropical climatic variations impact the genetic variability of  
796 triatomines: *Rhodnius ecuadoriensis*, principal vector of Chagas disease in Ecuador?  
797 *Acta Trop.* **209**, 105530 (2020).
- 798 18. Brown, J. E. *et al.* Worldwide patterns of genetic differentiation imply multiple  
799 ‘domestications’ of *Aedes aegypti*, a major vector of human diseases. *Proc. R. Soc. B*  
800 *Biol. Sci.* **278**, 2446–2454 (2011).
- 801 19. Powell, J. R., Gloria-Soria, A. & Kotsakiozi, P. Recent history of *Aedes aegypti*: Vector  
802 genomics and epidemiology records. *BioScience* vol. 68 854–860 (2018).
- 803 20. Soria-Carrasco, V. *et al.* Stick insect genomes reveal natural selection’s role in  
804 parallel speciation. *Science (80-. )*. **344**, 738–742 (2014).
- 805 21. Zumaya-Estrada, F. A. *et al.* North American import? Charting the origins of an  
806 enigmatic *Trypanosoma cruzi* domestic genotype. *Parasites and Vectors* **5**, 226  
807 (2012).
- 808 22. Piccinali, R. V. *et al.* Molecular Population Genetics and Phylogeography of the  
809 Chagas Disease Vector *Triatoma infestans* in South America. *J. Med. Entomol.* **46**,  
810 796–809 (2009).
- 811 23. Frantz, L. A. F. *et al.* Ancient pigs reveal a near-complete genomic turnover following  
812 their introduction to Europe. *Proc. Natl. Acad. Sci. U. S. A.* **116**, 17231–17238 (2019).
- 813 24. Mesquita, R. D. *et al.* Genome of *Rhodnius prolixus*, an insect vector of Chagas

- 814 disease, reveals unique adaptations to hematophagy and parasite infection. *Proc.*  
815 *Natl. Acad. Sci.* **112**, 14936–14941 (2015).
- 816 25. Marchant, A. *et al.* Under-Expression of Chemosensory Genes in Domiciliary Bugs of  
817 the Chagas Disease Vector *Triatoma brasiliensis*. *PLoS Negl. Trop. Dis.* **10**, (2016).
- 818 26. Liu, Q. *et al.* A chromosomal-level genome assembly for the insect vector for Chagas  
819 disease, *Triatoma rubrofasciata*. *Gigascience* **8**, (2019).
- 820 27. Tigano, A. & Friesen, V. L. Genomics of local adaptation with gene flow. *Mol. Ecol.*  
821 **25**, 2144–2164 (2016).
- 822 28. Grijalva, M. J. *et al.* Comprehensive Survey of Domiciliary Triatomine Species  
823 Capable of Transmitting Chagas Disease in Southern Ecuador. *PLoS Negl. Trop. Dis.*  
824 **9**, e0004142 (2015).
- 825 29. Grijalva, M. J., Suarez-Davalos, V., Villacis, A. G., Ocaña-Mayorga, S. & Dangles, O.  
826 Ecological factors related to the widespread distribution of sylvatic *Rhodnius*  
827 *ecuadoriensis* populations in southern Ecuador. *Parasit. Vectors* **5**, 17 (2012).
- 828 30. Villacís, A. G., Grijalva, M. J. & Catalá, S. S. Phenotypic Variability of *Rhodnius*  
829 *ecuadoriensis* Populations at the Ecuadorian Central and Southern Andean Region. *J.*  
830 *Med. Entomol.* **47**, 1034–1043 (2010).
- 831 31. Villacís, A. G. *et al.* Pioneer study of population genetics of *Rhodnius ecuadoriensis*  
832 (Hemiptera: Reduviidae) from the central coast and southern Andean regions of  
833 Ecuador. *Infect. Genet. Evol.* **53**, 116–127 (2017).
- 834 32. Ocaña-Mayorga, S., Llewellyn, M. S., Costales, J. A., Miles, M. A. & Grijalva, M. J.  
835 Sex, Subdivision, and Domestic Dispersal of *Trypanosoma cruzi* Lineage I in  
836 Southern Ecuador. *PLoS Negl. Trop. Dis.* **4**, e915 (2010).
- 837 33. Costales, J. A. *et al.* *Trypanosoma cruzi* population dynamics in the Central  
838 Ecuadorian Coast. *Acta Trop.* (2015) doi:10.1016/j.actatropica.2015.07.017.
- 839 34. De Souza, R. D. C. M. *et al.* Population dynamics of *Triatoma vitticeps* (Stål, 1859) in  
840 Itanhomi, Minas Gerais, Brazil. *Mem. Inst. Oswaldo Cruz* **103**, 14–20 (2008).
- 841 35. Kamimura, E. H. *et al.* Drivers of molecular and morphometric variation in *Triatoma*  
842 *brasiliensis* (Hemiptera: Triatominae): The resolution of geometric morphometrics for  
843 populational structuring on a microgeographical scale. *Parasites and Vectors* **13**, 455  
844 (2020).
- 845 36. Flores-Ferrer, A., Marcou, O., Waleckx, E., Dumonteil, E. & Gourbière, S.  
846 Evolutionary ecology of Chagas disease; what do we know and what do we need?  
847 *Evol. Appl.* **11**, 470–487 (2018).
- 848 37. Monteiro, F. A., Wesson, D. M., Dotson, E. M., Schofield, C. J. & Beard, C. B.  
849 Phylogeny and molecular taxonomy of the rhodniini derived from mitochondrial and  
850 nuclear DNA sequences. *Am. J. Trop. Med. Hyg.* **62**, 460–465 (2000).

- 851 38. El Mousadik, A. & Petit, R. J. High level of genetic differentiation for allelic richness  
852 among populations of the argan tree [*Argania spinosa* (L.) Skeels] endemic to  
853 Morocco. *Theor. Appl. Genet.* **92**, 832–839 (1996).
- 854 39. Lavore, A., Esponda-Behrens, N., Pagola, L. & Rivera-Pomar, R. The gap gene  
855 Krüppel of *Rhodnius prolixus* is required for segmentation and for repression of the  
856 homeotic gene *sex comb-reduced*. *Dev. Biol.* **387**, 121–129 (2014).
- 857 40. Lavore, A., Pagola, L., Esponda-Behrens, N. & Rivera-Pomar, R. The gap gene giant  
858 of *Rhodnius prolixus* is maternally expressed and required for proper head and  
859 abdomen formation. *Dev. Biol.* **361**, 147–155 (2012).
- 860 41. Ribeiro, J. M. . *et al.* Exploring the sialome of the blood-sucking bug *Rhodnius*  
861 *prolixus*. *Insect Biochem. Mol. Biol.* **34**, 61–79 (2004).
- 862 42. Hedrick, P. W. A STANDARDIZED GENETIC DIFFERENTIATION MEASURE.  
863 *Evolution (N. Y.)*. **59**, 1633–1638 (2005).
- 864 43. Weir, B. S. & Cockerham, C. C. ESTIMATING F -STATISTICS FOR THE ANALYSIS  
865 OF POPULATION STRUCTURE. *Evolution (N. Y.)*. **38**, 1358–1370 (1984).
- 866 44. Meirmans, P. G. USING THE AMOVA FRAMEWORK TO ESTIMATE A  
867 STANDARDIZED GENETIC DIFFERENTIATION MEASURE. *Evolution (N. Y.)*. **60**,  
868 2399–2402 (2006).
- 869 45. Peterman, W. E. ResistanceGA: An R package for the optimization of resistance  
870 surfaces using genetic algorithms. *Methods Ecol. Evol.* **9**, 1638–1647 (2018).
- 871 46. McRae, B. H., Dickson, B. G., Keitt, T. H. & Shah, V. B. USING CIRCUIT THEORY  
872 TO MODEL CONNECTIVITY IN ECOLOGY, EVOLUTION, AND CONSERVATION.  
873 *Ecology* **89**, 2712–2724 (2008).
- 874 47. Kivimäki, I., Shimbo, M. & Saerens, M. Developments in the theory of randomized  
875 shortest paths with a comparison of graph node distances. *Phys. A Stat. Mech. its*  
876 *Appl.* **393**, 600–616 (2014).
- 877 48. Paucar, R., Moreno-Viguri, E. & Pérez-Silanes, S. Challenges in Chagas Disease  
878 Drug Discovery: A Review. *Curr. Med. Chem.* **23**, 3154–3170 (2016).
- 879 49. Olivera, M. J. *et al.* Risk factors for treatment interruption and severe adverse effects  
880 to benznidazole in adult patients with Chagas disease. *PLoS One* **12**, (2017).
- 881 50. Sosa-Estani, S. Advances and challenges in the treatment of Chagas disease - a  
882 global perspective. *Int. J. Infect. Dis.* **73**, 51 (2018).
- 883 51. Kilpatrick, A. M. *et al.* Genetic Influences on Mosquito Feeding Behavior and the  
884 Emergence of Zoonotic Pathogens. *Am J Trop Med Hyg* **77**, 667–671 (2007).
- 885 52. Gillies, M. T. Selection for host preference in *Anopheles gambiae*. *Nature* **203**, 852–  
886 854 (1964).

- 887 53. Panzera, F. *et al.* Evolutionary and dispersal history of *Triatoma infestans*, main  
888 vector of Chagas disease, by chromosomal markers. *Infect. Genet. Evol.* **27**, 105–113  
889 (2014).
- 890 54. Santiago, P. B. *et al.* Proteases of haematophagous arthropod vectors are involved in  
891 blood-feeding, yolk formation and immunity - a review. *Parasites and Vectors* vol. 10  
892 1–20 (2017).
- 893 55. Guerenstein, P. G. & Lazzari, C. R. Host-seeking: How triatomines acquire and make  
894 use of information to find blood. *Acta Trop.* **110**, 148–158 (2009).
- 895 56. Sterkel, M. *et al.* Tyrosine Detoxification Is an Essential Trait in the Life History of  
896 Blood-Feeding Arthropods. *Curr. Biol.* **26**, 2188–2193 (2016).
- 897 57. Ocaña-Mayorga, S. *et al.* Triatomine feeding profiles and *Trypanosoma cruzi*  
898 infection, implications in domestic and sylvatic transmission cycles in Ecuador.  
899 *Pathogens* **10**, 1–17 (2021).
- 900 58. Vazquez-Prokopec, G. M., Ceballos, L. A., Kitron, U. & Gürtler, R. E. Active dispersal  
901 of natural populations of *Triatoma infestans* (Hemiptera: Reduviidae) in rural  
902 northwestern Argentina. *J. Med. Entomol.* **41**, 614–21 (2004).
- 903 59. Huestis, D. L. *et al.* Windborne long-distance migration of malaria mosquitoes in the  
904 Sahel. *Nature* vol. 574 404–408 (2019).
- 905 60. Brown, J. E. *et al.* HUMAN IMPACTS HAVE SHAPED HISTORICAL AND RECENT  
906 EVOLUTION IN *AEDES AEGYPTI*, THE DENGUE AND YELLOW FEVER  
907 MOSQUITO. *Evolution (N. Y.)*. **68**, 514–525 (2014).
- 908 61. Medley, K. A., Jenkins, D. G. & Hoffman, E. A. Human-aided and natural dispersal  
909 drive gene flow across the range of an invasive mosquito. *Mol. Ecol.* **24**, 284–295  
910 (2015).
- 911 62. Peterman, W. E. *et al.* A comparison of popular approaches to optimize landscape  
912 resistance surfaces. *Landsc. Ecol.* **34**, 2197–2208 (2019).
- 913 63. Castro-Arroyave, D., Monroy, M. C. & Irurita, M. I. Integrated vector control of Chagas  
914 disease in Guatemala: a case of social innovation in health. *Infect. Dis. Poverty* **9**, 25  
915 (2020).
- 916 64. Aljanabi, S. M. & Martinez, I. Universal and rapid salt-extraction of high quality  
917 genomic DNA for PCR-based techniques. *Nucleic Acids Res.* **25**, 4692–4693 (1997).
- 918 65. Hernandez-Castro, L. E. *et al.* 2b-RAD genotyping for population genomic studies of  
919 Chagas disease vectors: *Rhodnius ecuadoriensis* in Ecuador. *PLoS Negl. Trop. Dis.*  
920 **11**, e0005710 (2017).
- 921 66. Wang, S., Meyer, E., McKay, J. K. & Matz, M. V. 2b-RAD: a simple and flexible  
922 method for genome-wide genotyping. *Nat. Methods* **9**, 808–10 (2012).
- 923 67. DeAngelis, M. M., Wang, D. G. & Hawkins, T. L. Solid-phase reversible immobilization



- 924 for the isolation of PCR products. *Nucleic Acids Res.* **23**, 4742–3 (1995).
- 925 68. O'Leary, S. J., Puritz, J. B., Willis, S. C., Hollenbeck, C. M. & Portnoy, D. S. These  
926 aren't the loci you'e looking for: Principles of effective SNP filtering for molecular  
927 ecologists. *Mol. Ecol.* **27**, 3193–3206 (2018).
- 928 69. Franzén, O. *et al.* Shotgun Sequencing Analysis of *Trypanosoma cruzi* I Sylvio X10/1  
929 and Comparison with T. cruzi VI CL Brener. *PLoS Negl. Trop. Dis.* **5**, e984 (2011).
- 930 70. Schmieder, R. & Edwards, R. Fast Identification and Removal of Sequence  
931 Contamination from Genomic and Metagenomic Datasets. *PLoS One* **6**, e17288  
932 (2011).
- 933 71. Wood, D. E. & Salzberg, S. L. Kraken: ultrafast metagenomic sequence classification  
934 using exact alignments. *Genome Biol.* **15**, R46 (2014).
- 935 72. Mastretta-Yanes, A. *et al.* Restriction site-associated DNA sequencing, genotyping  
936 error estimation and de novo assembly optimization for population genetic inference.  
937 *Mol. Ecol. Resour.* **15**, 28–41 (2015).
- 938 73. Paris, J. R., Stevens, J. R. & Catchen, J. M. Lost in parameter space: a road map for  
939 stacks. *Methods Ecol. Evol.* **8**, 1360–1373 (2017).
- 940 74. Catchen, J., Hohenlohe, P. A., Bassham, S., Amores, A. & Cresko, W. A. Stacks: an  
941 analysis tool set for population genomics. *Mol. Ecol.* **22**, 3124–40 (2013).
- 942 75. Danecek, P. *et al.* The variant call format and VCFtools. *Bioinformatics* **27**, 2156–  
943 2158 (2011).
- 944 76. Money, D. *et al.* LinkImpute: Fast and Accurate Genotype Imputation for Nonmodel  
945 Organisms. *G3 (Bethesda)*. **5**, 2383–90 (2015).
- 946 77. Bradbury, P. J. *et al.* TASSEL: software for association mapping of complex traits in  
947 diverse samples. *Bioinformatics* **23**, 2633–2635 (2007).
- 948 78. GOUDET, J. hierfstat, a package for r to compute and test hierarchical F-statistics.  
949 *Mol. Ecol. Notes* **5**, 184–186 (2005).
- 950 79. Paradis, E. pegas: an R package for population genetics with an integrated-modular  
951 approach. *Bioinformatics* **26**, 419–420 (2010).
- 952 80. R Development Core Team. R: A language and environment for statistical computing.  
953 (2016).
- 954 81. Adamack, A. T. & Gruber, B. PopGenReport: Simplifying basic population genetic  
955 analyses in R. *Methods Ecol. Evol.* **5**, 384–387 (2014).
- 956 82. Bilton, T. P. *et al.* Linkage disequilibrium estimation in low coverage high-throughput  
957 sequencing data. *Genetics* **209**, 389–400 (2018).
- 958 83. Saitou, N. & Nei, M. The neighbor-joining method: a new method for reconstructing  
959 phylogenetic trees. *Mol. Biol. Evol.* **4**, 406–425 (1987).



- 960 84. Paradis, E. & Schliep, K. ape 5.0: an environment for modern phylogenetics and  
961 evolutionary analyses in R. *Bioinformatics* **35**, 526–528 (2019).
- 962 85. Jombart, T., Devillard, S. & Balloux, F. Discriminant analysis of principal components:  
963 a new method for the analysis of genetically structured populations. *BMC Genet.* **11**,  
964 94 (2010).
- 965 86. Jombart, T. adegenet: a R package for the multivariate analysis of genetic markers.  
966 *Bioinformatics* **24**, 1403–5 (2008).
- 967 87. Nei, M. Analysis of gene diversity in subdivided populations. *Proc. Natl. Acad. Sci. U.*  
968 *S. A.* **70**, (1973).
- 969 88. Benjamini, Y. & Hochberg, Y. Benjamini-1995.pdf. *Journal of the Royal Statistical*  
970 *Society B* vol. 57 289–300 (1995).
- 971 89. Briec, M. S. O., Ono, K., Drinan, D. P. & Naish, K. A. Integration of Random Forest  
972 with population-based outlier analyses provides insight on the genomic basis and  
973 evolution of run timing in Chinook salmon ( *Oncorhynchus tshawytscha* ). *Mol. Ecol.*  
974 **24**, 2729–2746 (2015).
- 975 90. Laporte, M. *et al.* RAD sequencing reveals within-generation polygenic selection in  
976 response to anthropogenic organic and metal contamination in North Atlantic Eels.  
977 *Mol. Ecol.* **25**, 219–237 (2016).
- 978 91. Briec, M. S. O., Waters, C. D., Drinan, D. P. & Naish, K. A. A practical introduction to  
979 Random Forest for genetic association studies in ecology and evolution. *Mol. Ecol.*  
980 *Resour.* **18**, 755–766 (2018).
- 981 92. Forester, B. R., Lasky, J. R., Wagner, H. H. & Urban, D. L. Comparing methods for  
982 detecting multilocus adaptation with multivariate genotype-environment associations.  
983 *Mol. Ecol.* **27**, 2215–2233 (2018).
- 984 93. Whitlock, M. C. & Lotterhos, K. E. Reliable detection of loci responsible for local  
985 adaptation: Inference of a null model through trimming the distribution of  $F_{ST}$ . *Am.*  
986 *Nat.* **186**, S24–S36 (2015).
- 987 94. Flanagan, S. P. & Jones, A. G. Constraints on the  $F_{ST}$ –Heterozygosity Outlier  
988 Approach. *J. Hered.* **108**, 561–573 (2017).
- 989 95. Breiman, L. Random Forests. *Mach. Learn.* **45**, 5–32 (2001).
- 990 96. Liaw, A. & Weiner, M. Classification and Regression by randomForest. *R news* 2(3)  
991 18–22 [https://www.r-project.org/doc/Rnews/Rnews\\_2002-3.pdf](https://www.r-project.org/doc/Rnews/Rnews_2002-3.pdf) (2002).
- 992 97. Holliday, J. A., Wang, T. & Aitken, S. Predicting Adaptive Phenotypes From Multilocus  
993 Genotypes in Sitka Spruce (*Picea sitchensis*) Using Random Forest. (2012)  
994 doi:10.1534/g3.112.002733.
- 995 98. Legendre, P. & Legendre, L. Canonical analysis. in *Developments in Environmental*  
996 *Modelling* vol. 24 625–710 (2012).

- 997 99. Oksanen, J. *Multivariate Analysis of Ecological Communities in R: vegan tutorial*.  
998 <http://cc.oulu.fi/~jarioksa/opetus/metodi/vegantutor.pdf> (2015).
- 999 100. Oksanen, J. *et al.* *vegan: Community Ecology Package*. (2019).
- 1000 101. Forester, B. R., Jones, M. R., Joost, S., Landguth, E. L. & Lasky, J. R. Detecting  
1001 spatial genetic signatures of local adaptation in heterogeneous landscapes. *Mol. Ecol.*  
1002 **25**, 104–120 (2016).
- 1003 102. Capblancq, T., Luu, K., Blum, M. G. B. & Bazin, E. Evaluation of redundancy analysis  
1004 to identify signatures of local adaptation. *Mol. Ecol. Resour.* **18**, 1223–1233 (2018).
- 1005 103. Hijmans, R. J. & Van Etten, J. *raster: Geographic analysis and modeling with raster*  
1006 *data*. (2012).
- 1007 104. Mantel, N. The Detection of Disease Clustering and a Generalized Regression  
1008 Approach. *Cancer Res.* **27**, 209–220 (1967).
- 1009 105. Goslee, S. C. & Urban, D. L. The ecodist Package for Dissimilarity-based Analysis of  
1010 Ecological Data. *J. Stat. Softw.* **22**, 1–19 (2007).
- 1011 106. Clarke, R. T., Rothery, P. & Raybould, A. F. Confidence limits for regression  
1012 relationships between distance matrices: Estimating gene flow with distance. *J. Agric.*  
1013 *Biol. Environ. Stat.* **7**, 361–372 (2002).
- 1014 107. MEIRMANS, P. G. & HEDRICK, P. W. Assessing population structure: FST and  
1015 related measures. *Mol. Ecol. Resour.* **11**, 5–18 (2011).
- 1016 108. MEIRMANS, P. G. & VAN TIENDEREN, P. H. genotype and genodive: two programs  
1017 for the analysis of genetic diversity of asexual organisms. *Mol. Ecol. Notes* **4**, 792–  
1018 794 (2004).
- 1019 109. Parra-Henao, G., Suárez-Escudero, L. C. & González-Caro, S. Potential Distribution  
1020 of Chagas Disease Vectors (Hemiptera, Reduviidae, Triatominae) in Colombia, Based  
1021 on Ecological Niche Modeling. *J. Trop. Med.* **2016**, (2016).
- 1022 110. Grijalva, M. J., Terán, D. & Dangles, O. Dynamics of sylvatic chagas disease vectors  
1023 in coastal Ecuador is driven by changes in land cover. *PLoS Negl. Trop. Dis.* **8**, e2960  
1024 (2014).
- 1025 111. Cohen, J. A power primer. *Psychol. Bull.* **112**, 155–159 (1992).
- 1026 112. Scrucca, L. GA: A package for genetic algorithms in R. *J. Stat. Softw.* **53**, 1–37  
1027 (2013).
- 1028 113. Peterman, W. E. *et al.* A comparison of popular approaches to optimize landscape  
1029 resistance surfaces. *Landsc. Ecol.* 1–12 (2019) doi:10.1007/s10980-019-00870-3.
- 1030 114. Fous, F., Pirotte, A., Renders, J. M. & Saerens, M. Random-walk computation of  
1031 similarities between nodes of a graph with application to collaborative  
1032 recommendation. *IEEE Trans. Knowl. Data Eng.* **19**, 355–369 (2007).

1033 115. Shah, V. B. & Mcrae, B. Circuitscape: A Tool for Landscape Ecology. in *Proceedings*  
1034 *of the 7th Python in Science Conference (SciPy 2008)* (eds. Varoquaux, G., Vaught,  
1035 T. & Millman, J.) 62–66 (2008).

1036

1037

## 1038 **Acknowledgements**

1039

1040 We thank P. Johnson for advice in statistical analyses, W. Peterman for helpful  
1041 advice on ResistanceGA analysis, the entomological team at CISEAL for sample  
1042 collection and M. Babbucci for proving custom scripts for 2b-RAD raw data cleaning.  
1043 This work was possible thanks to the Mexican Council of Science and Technology  
1044 doctorate scholarship (CVU Number 613766) awarded to L.E.H.C., the National  
1045 Institutes of Health (NIH) grant number R15 AI105749-01A1 allocated to MJG who is  
1046 PI, as well as RCUK Engagment Network (EP/T003782/1) which supported co-author  
1047 interactions. Funding was also received from Pontifical Catholic University of  
1048 Ecuador to MJG (grant # C13025, E13027, E13037, H13174, I13048). ELL was  
1049 supported by the National Institute of General Medical Sciences of the NIH, United  
1050 States (Award Numbers P20GM130418). The funders had no role in study design,  
1051 data collection and analysis, decision to publish, or preparation of the manuscript.

1052

1053

1054

1055

1056 **Author contributions**

1057

1058 L.E.H.C., M.S.L., and M.J.G. designed the study. L.E.H.C. and M.S.L. wrote the  
1059 manuscript with contributions from M.J.G., J.A.C., and E.L.L. A.G.V., A.J., B.C.,  
1060 C.C.D., S.O.M., C.A.Y., A.B., B.A., L.M., E.L.L. revised and edited the manuscript.  
1061 A.G.V., S.O.M., C.A.Y., and J.A.C. collected and provided triatomine samples from  
1062 Loja Ecuador. L.E.H.C performed DNA extraction and 2b-RAD library preparation.  
1063 B.A. performed NGS Illumina HiSeq. L.E.H.C analysed the data with contributions  
1064 from A.J. in the association analysis, B.C. in data decontamination/bioinformatics,  
1065 C.C.D., and E.L.L in the landscape genomic analyses.

1066

1067 **Competing interests**

1068 The authors declare no competing interests.

1069

1070 **Supplementary information**

1071 Supplementary Table 1 (excel file)

1072 Supplementary Methods (docx file)

1073

1074 **Figures 1 - 4**

1075 Figures in the order of appearance in main text.

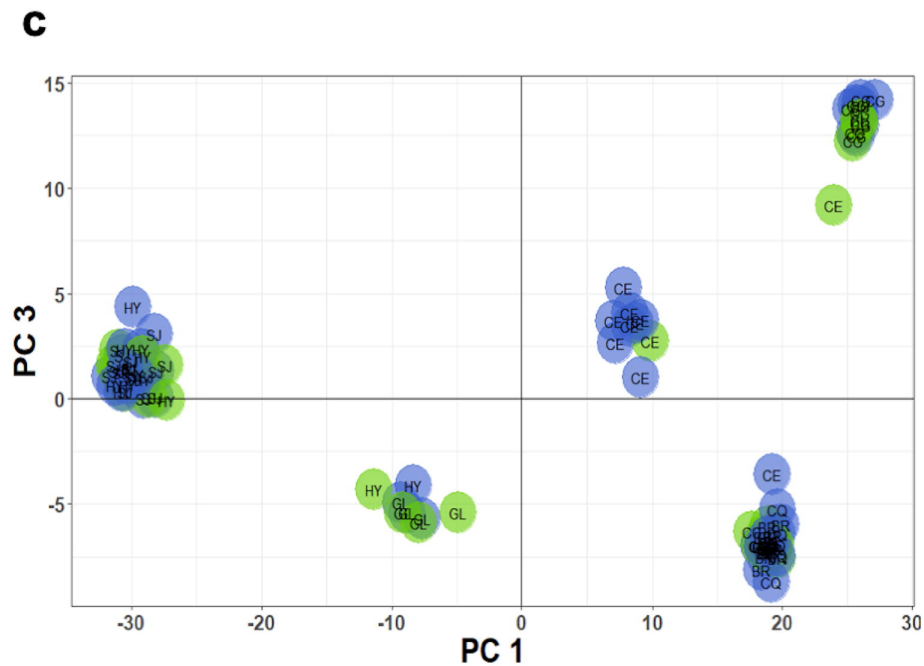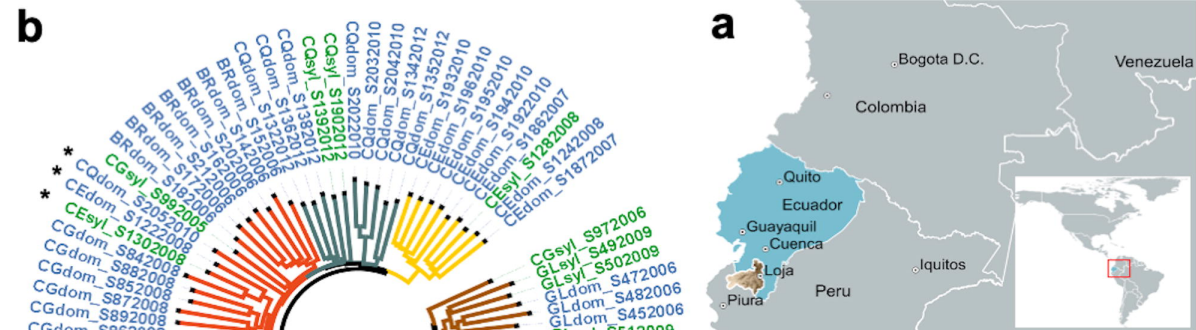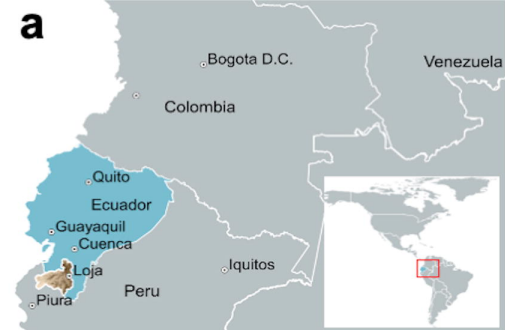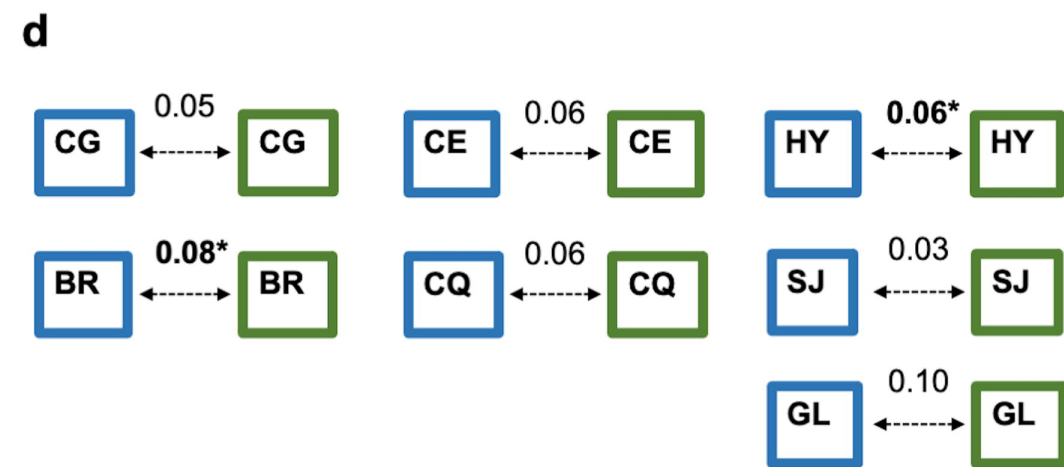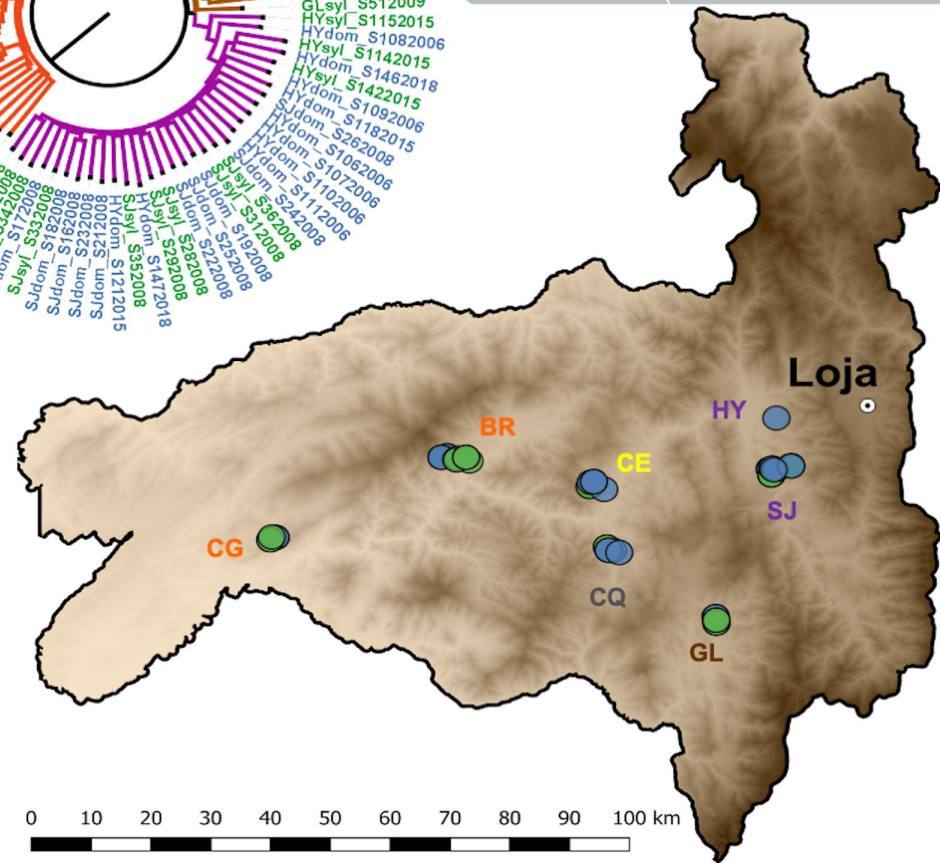



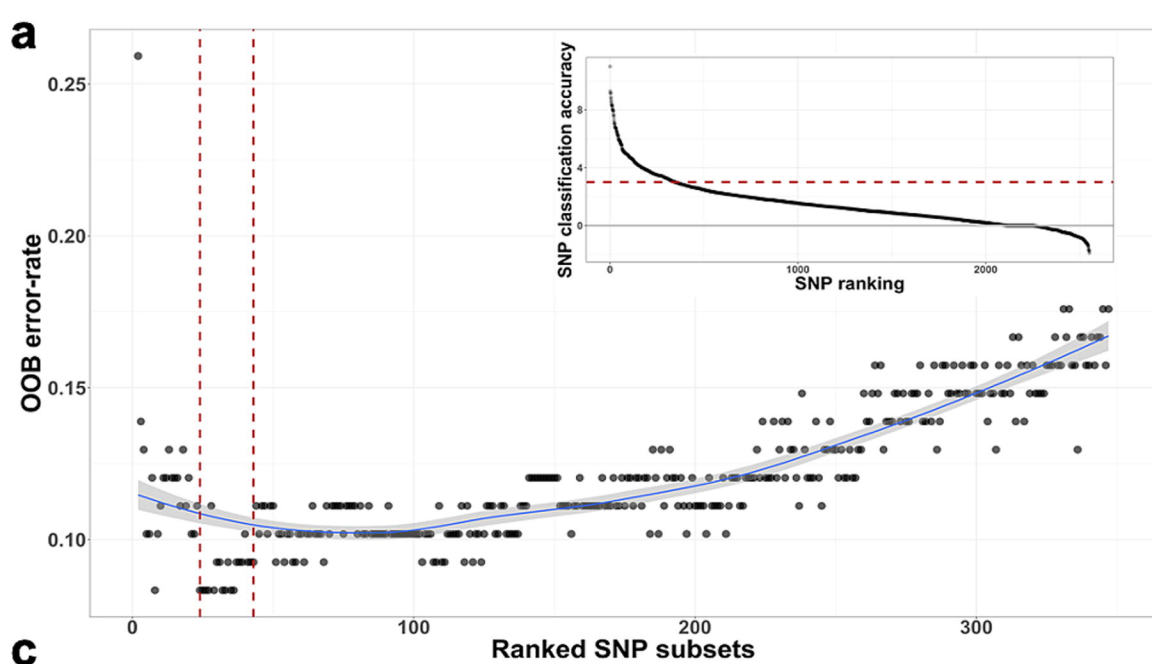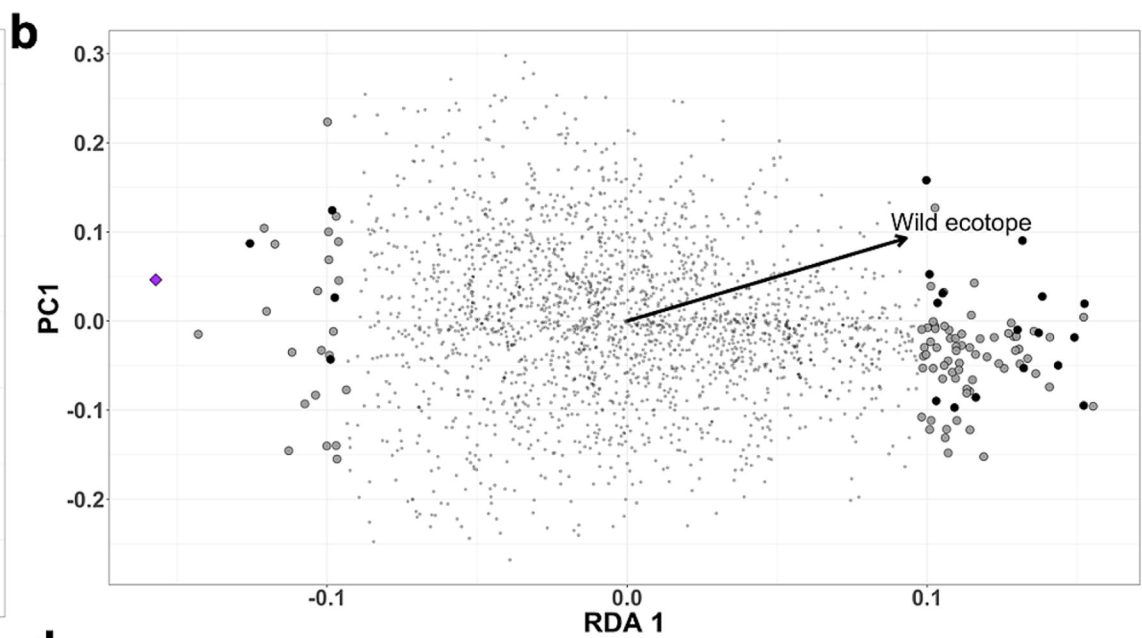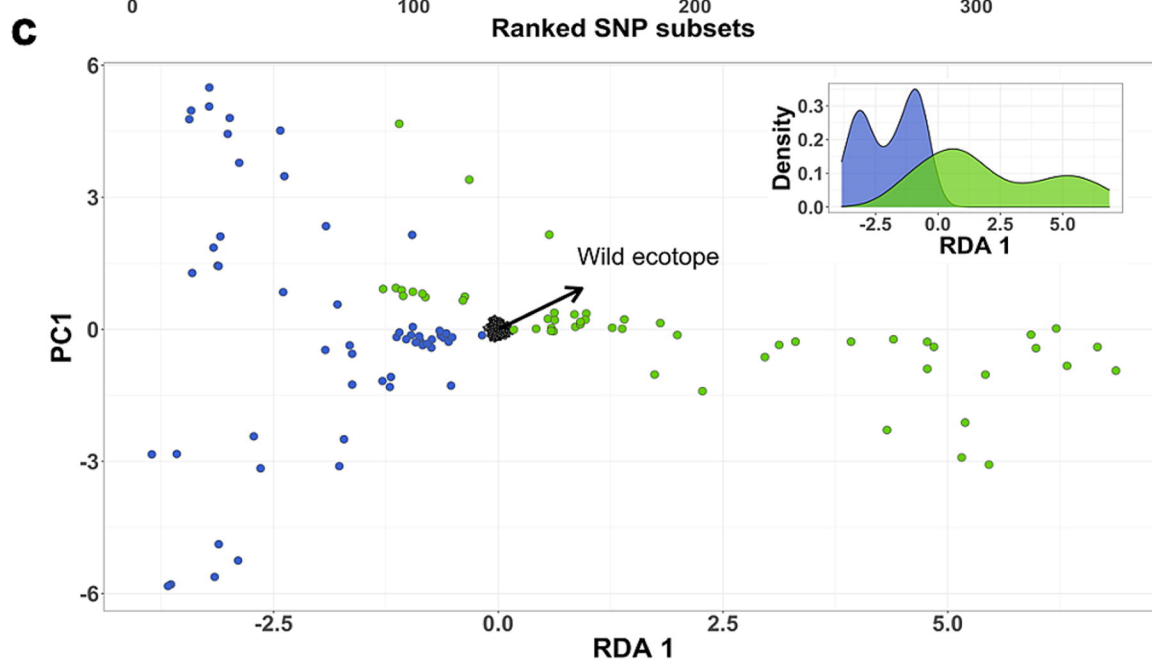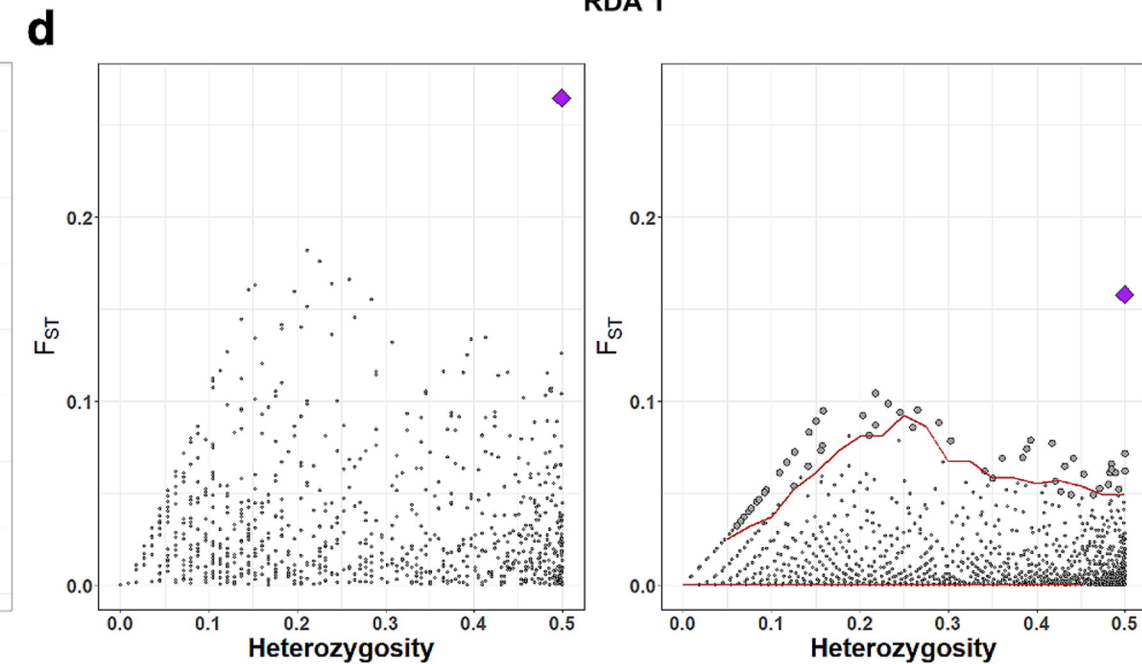

**a**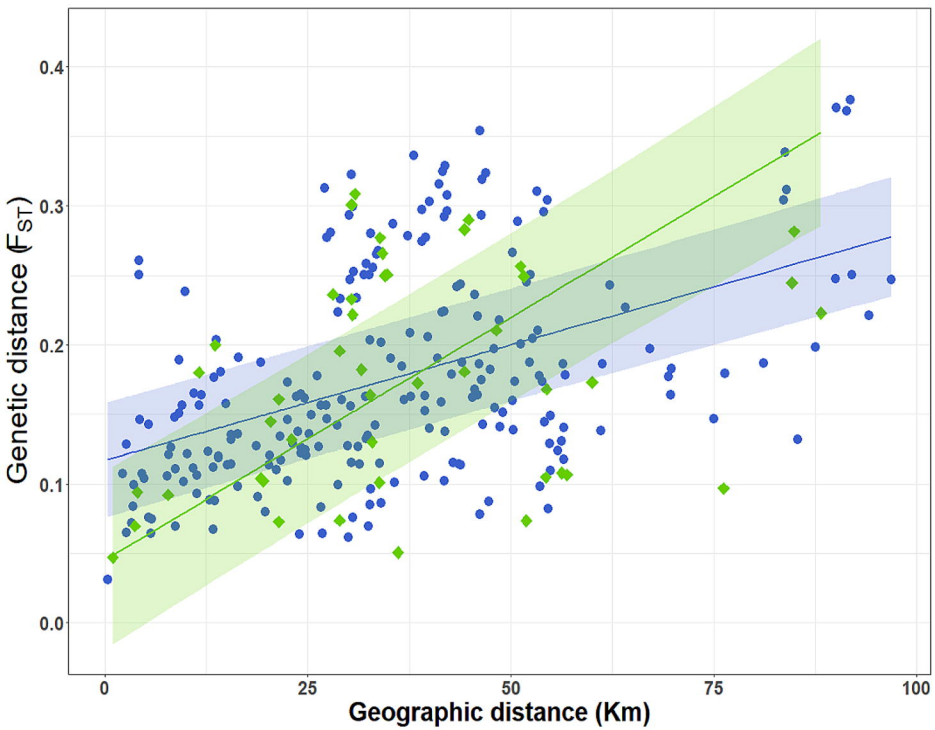**b**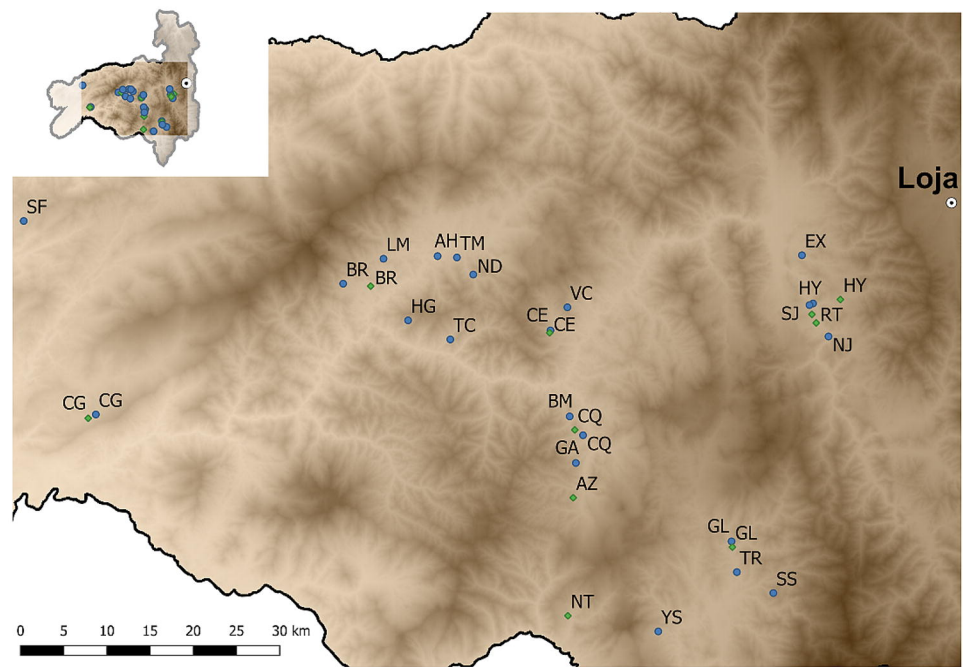

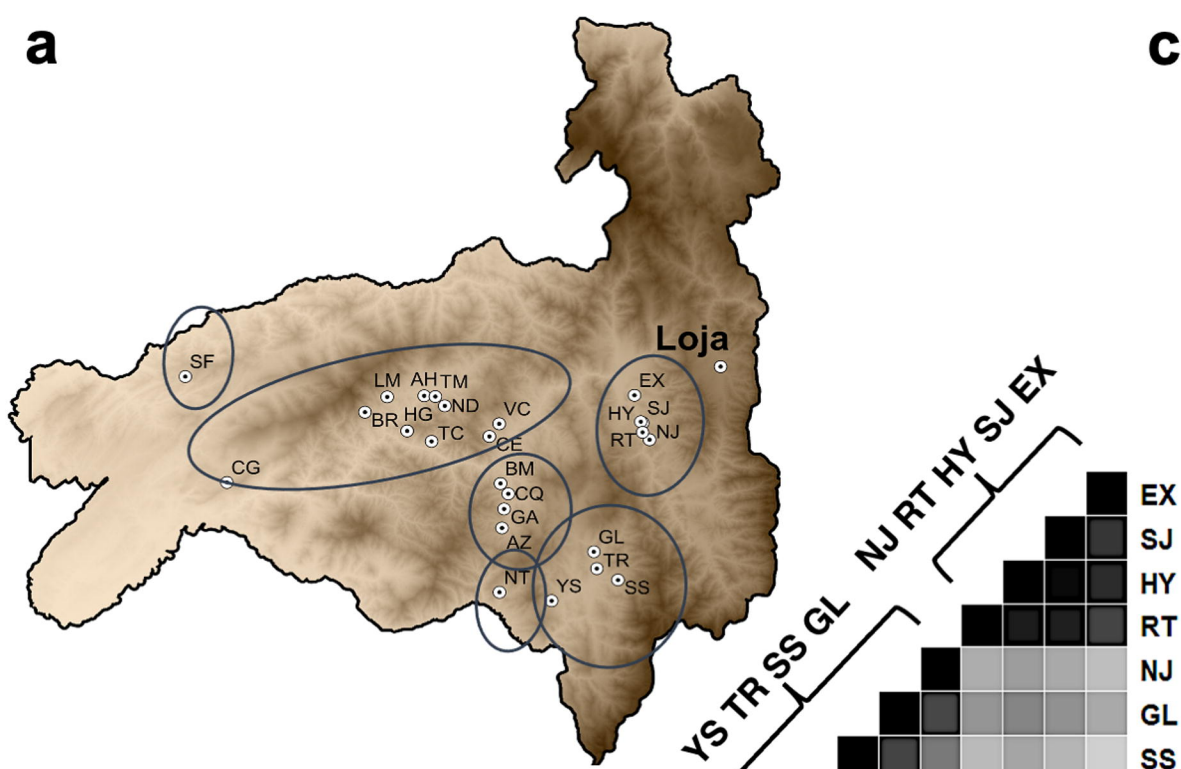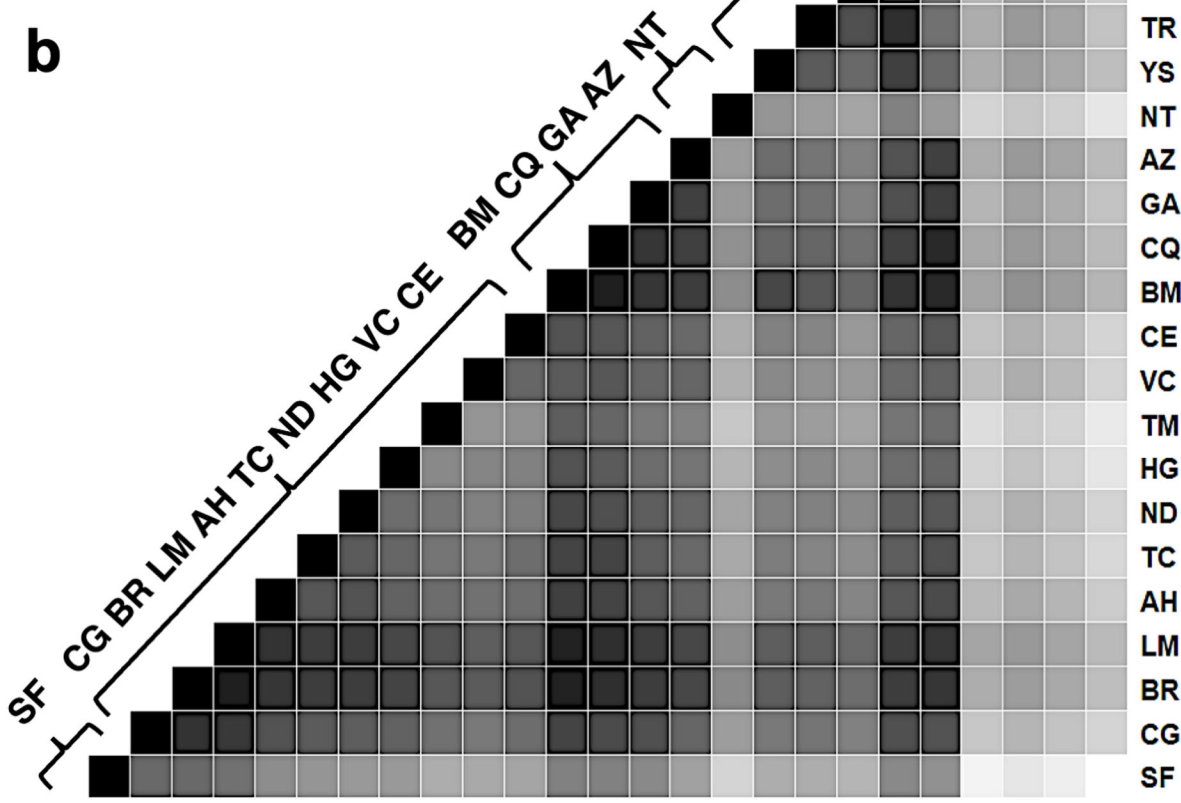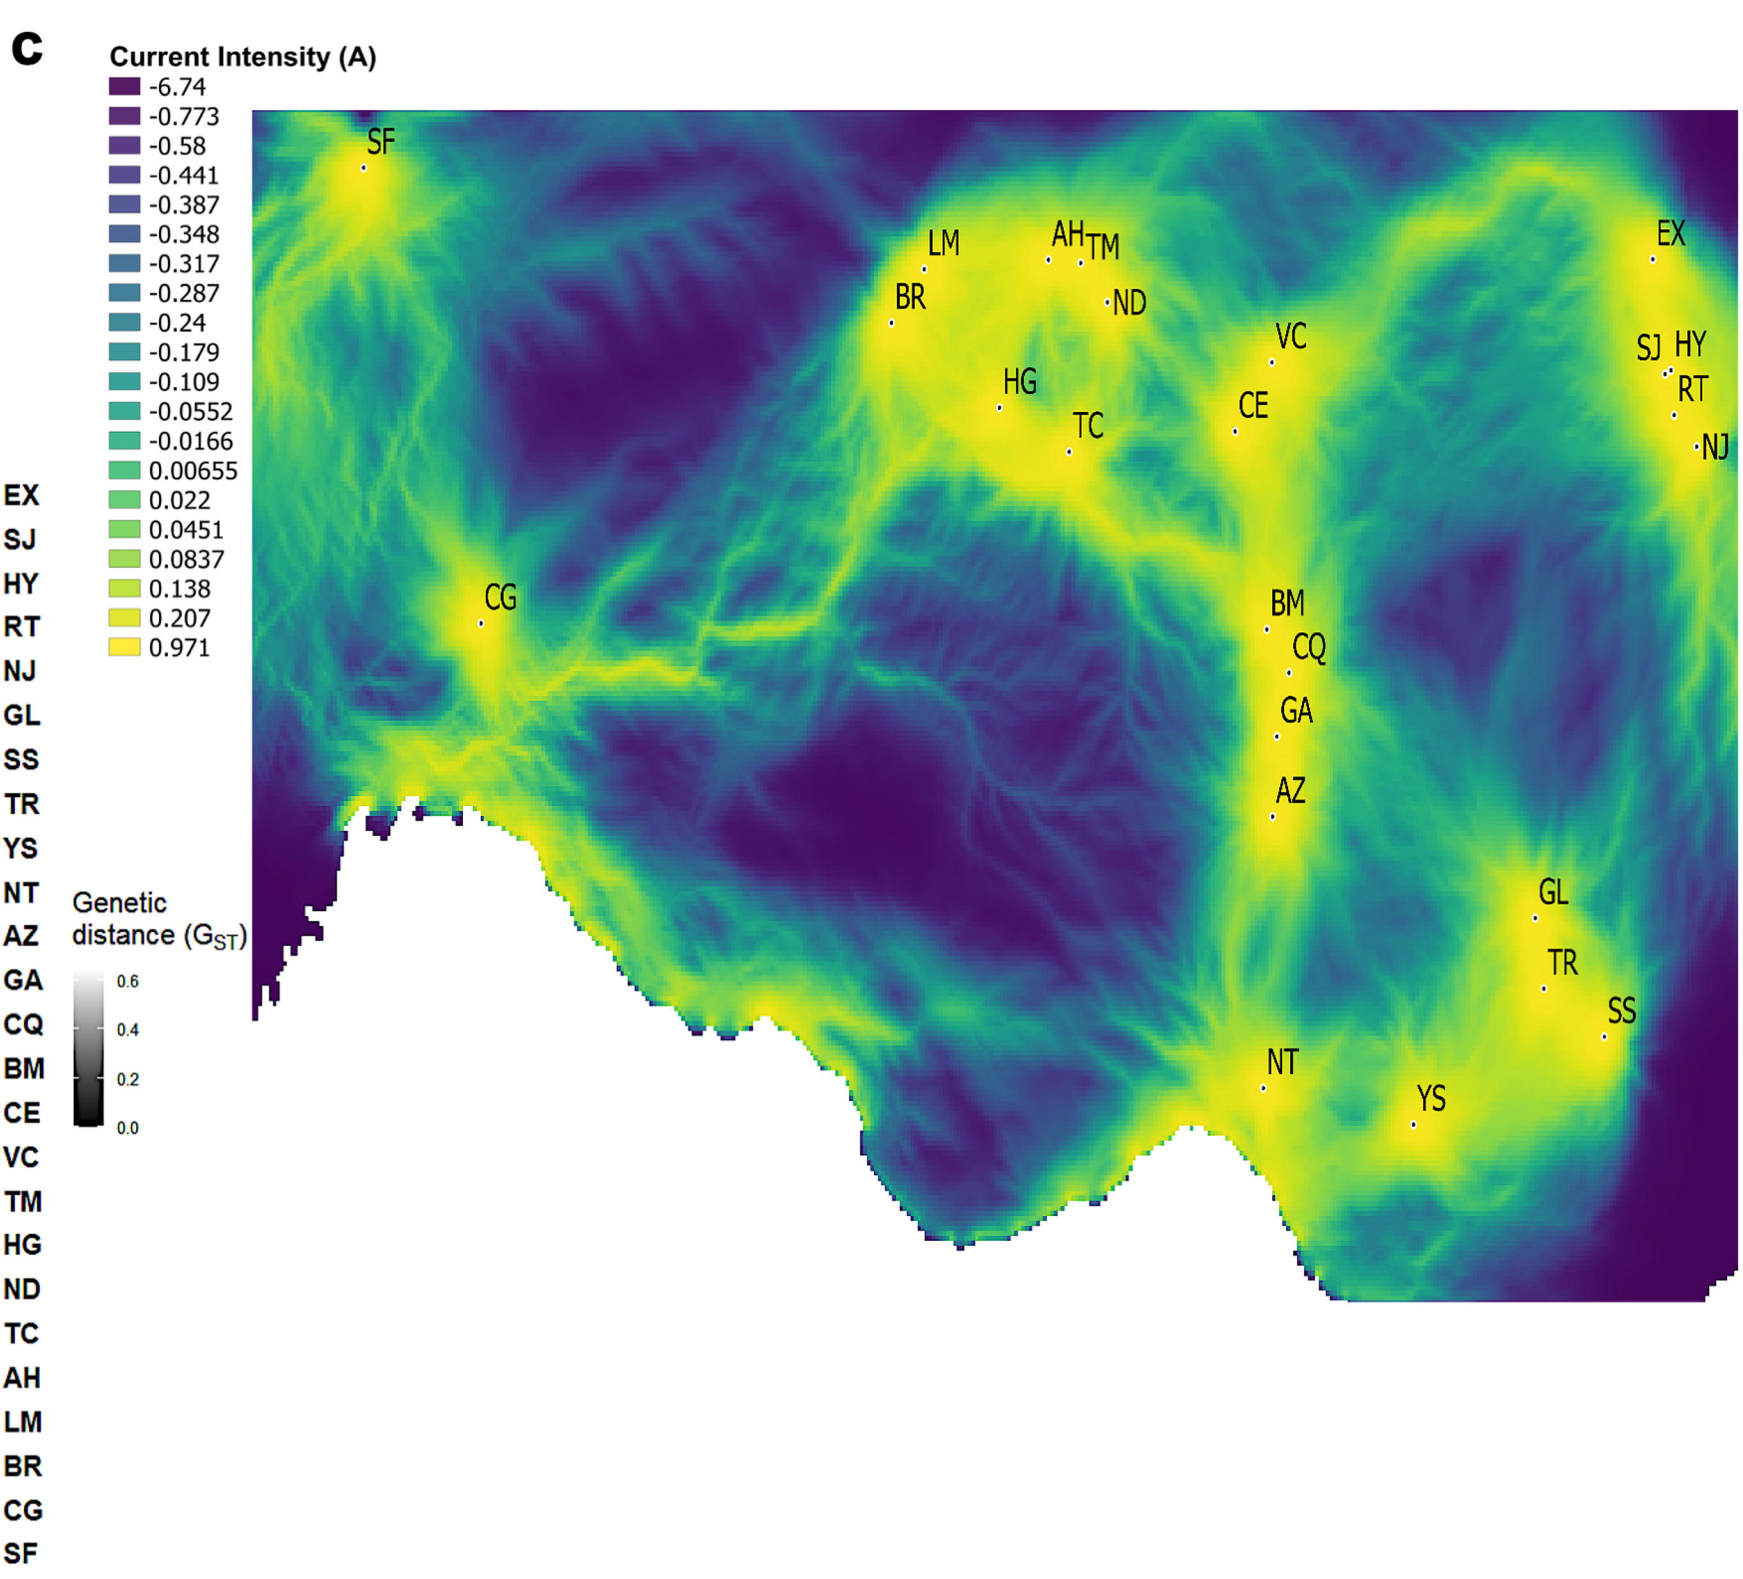

Source: https://www.biorxiv.org/content/biorxiv/early/2021/04/27/2021.04.27.441467.full.pdf
